1 **GREB1 amplifies androgen receptor output in prostate cancer and**  
2 **contributes to antiandrogen resistance**

3

4 Eugene Lee<sup>1</sup>, John Wongvipat<sup>1</sup>, Danielle Choi<sup>1</sup>, Ping Wang<sup>2</sup>, Deyou Zheng<sup>2,3</sup>, Philip A.  
5 Watson<sup>1</sup>, Anuradha Gopalan<sup>4</sup> and Charles L. Sawyers<sup>1,5</sup>

6

7 <sup>1</sup>Human Oncology and Pathogenesis Program, Memorial Sloan Kettering Cancer  
8 Center, New York, NY, USA

9 <sup>2</sup>Department of Genetics, Albert Einstein College of Medicine, Bronx, NY, USA

10 <sup>3</sup>Department of Neurology and Neuroscience, Albert Einstein College of Medicine,  
11 Bronx, NY, USA

12 <sup>4</sup>Department of Pathology, Memorial Sloan Kettering Cancer Center, New York, NY,  
13 USA

14 <sup>5</sup>Howard Hughes Medical Institute, Chevy Chase, Maryland, USA

15 **Abstract**

16 Genomic amplification of the androgen receptor (AR) is an established mechanism  
17 of antiandrogen resistance in prostate cancer. Here we show that the magnitude of  
18 AR signaling output, independent of AR genomic alteration or expression level, also  
19 contributes to antiandrogen resistance, through upregulation of the coactivator  
20 GREB1. We demonstrate 100-fold heterogeneity in AR output within cell lines and  
21 show that cells with high AR output have reduced sensitivity to enzalutamide.  
22 Through transcriptomic and shRNA knockdown studies, together with analysis of  
23 clinical datasets, we identify GREB1 as a gene responsible for high AR output. We  
24 show that GREB1 is an AR target gene that amplifies AR output by enhancing AR  
25 DNA binding and promoting p300 recruitment. GREB1 knockdown in high AR  
26 output cells restores enzalutamide sensitivity in vivo. Thus, GREB1 is a candidate  
27 driver of enzalutamide resistance through a novel feed forward mechanism.

## 28 **Introduction**

29           Androgen receptor (AR) targeted therapy is highly effective in advanced  
30 prostate cancer but is complicated by the emergence of drug resistance, called  
31 castration-resistant prostate cancer (CRPC) (Shen & Abate-Shen, 2010; Watson,  
32 Arora, & Sawyers, 2015). The most common mechanism of CRPC is restored AR  
33 signaling, primarily through amplification of AR (C. D. Chen et al., 2004; Robinson et  
34 al., 2015). The importance of AR amplification as a clinically important drug  
35 resistance mechanism is underscored by recent data showing that AR amplification,  
36 detected in circulating tumor DNA or in circulating tumor cells (CTCs), is correlated  
37 with reduced clinical benefit from the next generation AR inhibitors abiraterone or  
38 enzalutamide (Annala et al., 2018; Podolak et al., 2017).

39           Genomic landscape studies of prostate cancer have revealed several  
40 molecular subtypes defined by distinct genomic drivers (Berger et al., 2011; Cancer  
41 Genome Atlas Research, 2015; Taylor et al., 2010). In addition to this genomic  
42 heterogeneity, primary prostate cancers also display heterogeneity in AR  
43 transcriptional output, measured by an AR activity score (Hieronymus et al., 2006).  
44 Notably, these differences in transcriptional output occur in the absence of genomic  
45 alterations in AR, which are generally found only in CRPC (Cancer Genome Atlas  
46 Research, 2015). One potential explanation for this heterogeneity in AR  
47 transcriptional output is through coactivators and other AR regulatory proteins  
48 such as FOXA1, SPOP, FOXF1 and TRIM24 (Cancer Genome Atlas Research, 2015;  
49 Geng et al., 2013; Groner et al., 2016; Pomerantz et al., 2015; Takayama et al., 2014).

50           Much of the work to date has focused on inter-tumoral heterogeneity. Here  
51 we address the topic of intra-tumoral heterogeneity in AR transcriptional output, for  
52 which we find substantial evidence in prostate cancer cell lines and in primary  
53 prostate tumors. Using a sensitive reporter of AR transcriptional activity to isolate  
54 cells with low versus high AR output, we show that high AR output cells have an  
55 enhanced response to low doses of androgen and reduced sensitivity to  
56 enzalutamide, in the absence of changes in AR mRNA and protein expression. To  
57 understand the molecular basis for these differences, we performed transcriptome  
58 and shRNA knockdown studies and identified three genes (GREB1, KLF8 and  
59 GHRHR) upregulated in high AR output cells, all of which promote AR  
60 transcriptional activity through a feed-forward mechanism. Of these, we prioritized  
61 GREB1 for further characterization because GREB1 mRNA levels are increased in  
62 primary prostate tumors that have high AR activity. GREB1 amplifies AR  
63 transcriptional activity through a two-part mechanism: by promoting p300  
64 recruitment and by enhancing AR binding to chromatin. Importantly, GREB1  
65 knockdown converted high AR output cells to a low AR output state and restored  
66 enzalutamide sensitivity in vivo. Collectively, these data implicate GREB1 as an AR  
67 signal amplifier that contributes to prostate cancer disease progression and  
68 antiandrogen resistance.

69

## 70 **Results**

### 71 Isolation of cells with low and high AR output but comparable AR expression

72 Previous work using a PSA promoter/GFP reporter (PSAP-eGFP) showed that  
73 LNCaP prostate cancer cells display varying levels of eGFP expression.  
74 Characterization of low GFP cells in this analysis revealed reduced AR levels and  
75 increased expression of stem cell and developmental gene sets (Qin et al., 2012).  
76 We explored this question in the context of the contemporary data on heterogeneity  
77 in AR transcriptional output using a different AR-responsive reporter, ARR<sub>3</sub>tk-eGFP,  
78 where eGFP expression is driven by the probasin promoter modified to contain  
79 three AR responsive elements (Snoek et al., 1998). LNCaP (Figure 1) and CWR22PC-  
80 EP (Figure 1-figure supplement 1) prostate cancer cells containing a single copy of  
81 the reporter construct were derived by infection with lentivirus containing the  
82 reporter at a low multiplicity of infection (MOI) (Figure 1A). Remarkably, we  
83 observed >100-fold range in eGFP expression, as measured by flow cytometry,  
84 despite similar levels of AR by immunofluorescence microscopy (Figure 1B,C, Figure  
85 1-figure supplement 1A).

86 We then used flow cytometry to isolate eGFP-positive cells from both ends of the  
87 spectrum of AR transcriptional output, which we refer to as AR-hi (high AR output)  
88 and AR-low (low AR output) cells respectively (Figure 1C, Figure 1-figure  
89 supplement 1A). AR-hi cells also express higher levels of endogenous AR target  
90 genes (FKBP5, PSA, TRPM8) (Figure 1D,E, Figure 1-figure supplement 1B,C), and  
91 have an overall increase in AR transcriptional activity based on RNA-sequencing  
92 analysis (Figure 1F). In addition, the AR-low and AR-hi transcriptional phenotypes  
93 remain stable for over 30 days post sorting (Figure 1G, Figure 1-figure supplement  
94 1D). Interestingly, AR-low cells showed upregulation of gene sets related to

95 proliferation and cell cycle (Figure 1-source data 1). Of note, Qin et al (Qin et al.,  
96 2012) reported downregulation of these gene sets in their low/absent PSA cells,  
97 suggesting that the two reporters read out different transcriptional activities.  
98 Importantly, the difference in AR output between AR-low and AR-hi cells is not  
99 explained by different levels of AR expression or nuclear translocation, since both  
100 were comparable in each subpopulation (Figure 1D,E, Figure 1-figure supplement  
101 1B,C, Figure 1-figure supplement 2).

102 We next asked if isolated AR-low and AR-hi populations have different responses  
103 to ligands such as dihydrotestosterone (DHT) or antagonists such as enzalutamide.  
104 AR-hi cells showed enhanced sensitivity to DHT in a dose-dependent manner  
105 (Figure 1H; Figure 1-figure supplement 1E). This result is similar to the effect of  
106 increased AR expression in conferring sensitivity to low doses of androgen (C. D.  
107 Chen et al., 2004), but now without a change in AR level. To address sensitivity to  
108 enzalutamide, we used LNCaP/AR xenografts (derived from LNCaP cells) because  
109 this model has a track record of revealing clinically relevant mechanisms of  
110 enzalutamide resistance (Arora et al., 2013; Balbas et al., 2013). As we did with  
111 LNCaP and CWR22PC-EP cells, we derived AR-low and AR-hi subpopulations by  
112 flow cytometry and also observed differential AR output despite similar levels of AR  
113 expression (Figure 1-figure supplement 3A-C). Remarkably, AR-hi cells developed  
114 enzalutamide resistance significantly faster than AR-low or parental cells when  
115 injected into castrated mice treated with enzalutamide (Figure 1I).

116 Having demonstrated heterogeneous AR output within prostate cancer cell lines,  
117 we asked if similar, intra-tumoral heterogeneity is observed clinically by

118 immunohistochemical analysis of PSA and AR expression in several primary  
119 cancers. Consistent with previous reports (Qin et al., 2012; Ruizeveld de Winter et  
120 al., 1994), we observed heterogeneous PSA staining that is not strictly correlated  
121 with AR level. For example, we found variable intensity of PSA staining in tumor  
122 cells with comparable levels of AR staining (lined boxes; Figure 1-figure supplement  
123 4) and, conversely, variable intensity of AR staining in tumor cells with similar PSA  
124 staining (dotted circles; Figure 1-figure supplement 4). Although this is a small  
125 dataset, the results indicate that the AR transcriptional heterogeneity we observe in  
126 prostate cancer cell lines is present in patient samples. Emerging technologies for  
127 conducting single cell RNA and protein analysis in clinical material will enable  
128 deeper investigation of this question.

#### 129 GREB1 maintains high AR transcriptional output

130 To elucidate the molecular basis underlying the differences in AR-low and  
131 AR-hi cells, we performed RNA-sequencing and found 69 genes upregulated in AR-  
132 low cells and 191 genes upregulated in AR-hi cells (fold change  $\geq 1.5$ ,  $p < 0.05$ ,  
133 Figure 2-source data 1). In addition to enrichment of gene sets regulated by  
134 androgen (Figure 1F), human prostate luminal and basal cell gene sets were  
135 enriched in AR-hi and AR-low cells, respectively (Figure 2A). Based on these results  
136 we postulated that high AR output could be a consequence of upregulation of  
137 transcriptional co-activators and/or of genes involved in luminal differentiation.  
138 We therefore filtered the list of 191 genes upregulated in AR-hi cells and identified  
139 33 genes annotated as co-activators or luminal genes (Figure 2-source data 2), then  
140 measured the consequence of shRNA knockdown of each one on AR output in AR-hi

141 cells (Figure 2B). 3 of the 33 candidate genes (GREB1, GHRHR, KLF8) inhibited AR  
142 activity when knocked down in AR-hi cells, with successful knockdown confirmed  
143 by qRT-PCR (Figure 2C,D). AR knockdown served as a positive control, and ACP  
144 (one of the 30 genes that did not score) served as a negative control. Interestingly,  
145 all three hits are transcriptional upregulated by DHT simulation (Figure 2E), which  
146 likely explains their increased expression in AR-hi cells.

147       Among the three, GREB1 emerged as the most compelling candidate for  
148 further investigation based on interrogation of clinical datasets. Specifically, we  
149 found increased expression of GREB1, but not GHRHR or KLF8, in primary prostate  
150 tumors from the TCGA dataset with high AR output scores (top 5%) versus low AR  
151 output scores (bottom 5%) (Figure 2F,G). To be sure that GREB1 is relevant in  
152 other model systems, we confirmed GREB1 upregulation in CWR22PC-EP AR-hi cells  
153 (Figure 2-figure supplement 1A) and reduced AR output after GREB1 knockdown  
154 (Figure 2-figure supplement 1B). We further validated the knockdown data using  
155 CRISPR/Cas9, which also showed inhibition of AR output (by flow cytometry) and  
156 highly reduced PSA expression in LNCaP AR-hi sublines expressing different sgRNAs  
157 targeting GREB1, without detectable changes in AR protein level (Figure 2H,I).

#### 158 GREB1 amplifies AR transcriptional activity by enhancing AR DNA binding

159       GREB1 was first reported as an estrogen-regulated gene in breast cancer  
160 (Rae et al., 2005) then shown to bind directly to ER, presumably through its LxxLL  
161 motif, and function as an ER coactivator by promoting interaction with cofactors  
162 (Mohammed et al., 2013). To determine if GREB1 also functions as an AR  
163 coactivator, we introduced exogenous GREB1 (HA-GREB1) into AR-low LNCaP and



164 CWR22PC-EP cells and derived stably expressing sublimes (Figure 3A, Figure 3-  
165 figure supplement 1A). GREB1 overexpression enhanced DHT-induced AR target  
166 gene expression in a dose-dependent manner (Figure 3B,C, Figure 3-figure  
167 supplement 1B), indicating that GREB1 also promotes AR activity.

168 In breast cancer, GREB1 functions as a coactivator through binding to ER and  
169 recruitment of the p300/CBP complex to ER target genes (Mohammed et al., 2013).  
170 We find that GREB1 functions similarly in prostate cells, as shown by co-  
171 immunoprecipitation documenting AR-GREB1 interaction (Figure 3D) and ChIP  
172 experiments showing recruitment of GREB1 to PSA and FKBP5 enhancer regions  
173 (Figure 3E). Furthermore, AR-hi cells showed a GREB1-dependent increase in p300  
174 binding (Figure 3F,G) and GREB1 overexpression increased p300 recruitment to AR  
175 target genes in AR-low cells (Figure 3-figure supplement 2A).

176 In addition to this canonical coactivator function of promoting assembly of an  
177 active transcription complex, we found that GREB1 also impacts AR DNA binding.  
178 For example, knockdown or CRISPR deletion of GREB1 in AR-hi cells significantly  
179 reduced binding of AR to the PSA enhancer and, conversely, GREB1 overexpression  
180 promoted AR recruitment in AR-low cells (Figure 3H, Figure 3-figure supplement  
181 2B). AR ChIP-sequencing revealed that this effect is genome-wide, with a significant  
182 reduction in the mean height of AR peaks in GREB1-depleted cells (Figure 3I-K).  
183 Importantly, the location of AR peaks (enhancer, promoter) was identical in intact  
184 versus GREB1 knockdown cells and there were no differences in consensus binding  
185 sites (Figure 3-figure supplement 2C,D). Therefore, GREB1 enhances AR DNA  
186 efficiency but not alter DNA binding site specificity. As seen previously in our

187 analysis of AR-hi cells, total and nuclear AR levels were not changed by GREB1  
188 knockdown or overexpression (Figure 3C, Figure 3-figure supplement 2E,F).

189 Of note, earlier studies of GREB1 in breast cancer did not report any effect on  
190 ER DNA binding (Mohammed et al., 2013), which we confirmed by GREB1  
191 knockdown in MCF7 breast cancer cells (Figure 3-figure supplement 3A,B). Thus,  
192 GREB1 functions as a coactivator of both ER and AR but through somewhat different  
193 mechanisms. To address the possibility that other hormone receptor coactivators  
194 might also function differently in prostate cells, we asked if SRC-1 and SRC-2,  
195 previously shown to recruit the p300/CBP complex to AR (Leo & Chen, 2000), also  
196 influence AR DNA binding. To do so, we knocked down both genes in AR-hi cells  
197 based on prior work showing redundancy between SRC-1 and SRC-2 (Leo & Chen,  
198 2000; Q. Wang, Carroll, & Brown, 2005). AR reporter activity and target gene  
199 expression was inhibited in SRC1/2-depleted cells, as expected, but AR occupancy of  
200 AR binding sites was unchanged (Figure 3-figure supplement 3C-E). Thus, in  
201 addition to a role in p300/CBP recruitment, GREB1 has unique effects on AR DNA  
202 binding that distinguish it from other coactivators.

### 203 GREB1 is required for enzalutamide resistance of high AR output cells

204 Having demonstrated that GREB1 is overexpressed in AR-hi cells and  
205 functions as an AR coactivator, we asked if GREB1 is required for maintenance of the  
206 AR-hi state. First we evaluated the consequences of GREB1 knockdown on  
207 transcription. Consistent with experiments in AR-low cells showing that GREB1  
208 overexpression enhanced AR transcriptional activity (Figure 3B,C, Figure 3-figure  
209 supplement 1B), GREB1 knockdown inhibited baseline and DHT-induced AR target

210 gene expression in AR-hi cells (Figure 4A-C, Figure 4-figure supplement 1A,B). RNA-  
211 sequencing confirmed enrichment of androgen down-regulated gene sets in GREB1-  
212 depleted cells (Figure 4D) as well as downregulation of the 20 AR target genes used  
213 to calculate the AR activity score in TCGA tumors (Figure 4-figure supplement 1C).  
214 GREB1 knockdown cells also showed enrichment of the same prostate basal gene  
215 set that was enriched in AR-low cells (Figure 4D, refer also to Figure 2A). Additional  
216 analysis of RNA-seq data suggests that GREB1 is a major molecular determinant of  
217 the AR-hi state: specifically, (i) GREB1 knockdown impaired the induction of >70%  
218 of all DHT-induced genes (Figure 4E, Figure 4-source data 1,2) and (ii) the top 100  
219 gene sets enriched in GREB1-depleted AR-hi cells and AR-low cells show significant  
220 overlap (Figure 4F, Figure 4-source data 3).

221 Earlier we showed that AR-hi cells rapidly acquire resistance to  
222 enzalutamide (refer to Figure 1I). To determine the role of GREB1 in this drug  
223 resistant phenotype, we performed knockdown experiments using the LNCaP/AR  
224 xenograft. After confirming that AR activity was inhibited in AR-hi cells (Figure 4-  
225 figure supplement 1D,E), we injected LNCaP/AR-hi xenografts with GREB1 shRNAs  
226 into castrated mice treated with enzalutamide and found a significant delay in the  
227 development of enzalutamide resistance after 10 weeks (Figure 4G). Clinical data  
228 from CRPC patients also supports for a role of GREB1 in enzalutamide resistance,  
229 based on increased GREB1 expression in those who progressed on enzalutamide  
230 treatment (Figure 4H).

231

232 **Discussion**

233           There is abundant evidence from tumor sequencing studies that genomic  
234 alterations in AR (amplification and/or mutation) are present in over 50% of CRPC  
235 patients (Cancer Genome Atlas Research, 2015; Robinson et al., 2015) and that AR  
236 amplification is associated with a less favorable clinical response to abiraterone or  
237 enzalutamide treatment (Annala et al., 2018; Podolak et al., 2017). Therefore, high  
238 levels of AR transcriptional output can promote castration-resistant disease  
239 progression. Here we show that prostate cancers can amplify AR output through  
240 increased expression of the dual AR/ER coactivator GREB1, in the absence of  
241 genomic AR alterations. As with genomic AR amplification, increased AR output  
242 driven by high GREB1 expression is also associated with enzalutamide resistance.

243           In addition to demonstrating the importance of transcriptional heterogeneity  
244 in drug resistance, we also show that GREB1 amplifies AR activity by a novel two-  
245 part mechanism. Similar to canonical coactivators such as SRC1/2, GREB1 binds AR  
246 and promotes the assembly of an active transcription complex by recruitment of  
247 histone acetyl transferases such as p300/CBP (Lee & Lee Kraus, 2001). However,  
248 GREB1 has the additional property of improving the efficiency of AR binding to DNA,  
249 which further enhances AR transcriptional output. Although conceptually distinct  
250 from canonical coactivators, this dual mechanism of AR activation is may not be  
251 unique to GREB1. For example, TRIM24 has been shown to function as an oncogenic  
252 AR cofactor and, similar to GREB1, knockdown of TRIM24 impairs recruitment of  
253 AR to target genes (Groner et al., 2016). Curiously, the effect of GREB1 on AR DNA  
254 binding is not seen with ER, suggesting different conformational consequences of  
255 GREB1 binding on AR and ER respectively then influence DNA binding.

256           One curious observation is the fact that prostate cancers can maintain  
257 transcriptional heterogeneity as a stable phenotype, despite the fact that GREB1  
258 expression drives a feed forward loop which, in principle, should result in an  
259 increased fraction of high AR output cells over time. One potential explanation for  
260 the ability of these populations to maintain stable proportions of high versus low AR  
261 output cells at steady state is the fact that androgen has growth inhibitory effects at  
262 higher concentrations (Culig et al., 1999). Because GREB1 amplifies the magnitude  
263 of AR output in response to normal (growth stimulatory) androgen concentrations,  
264 the biologic consequence of high GREB1 levels could be the same growth  
265 suppression seen with high androgen concentrations. This model predicts that high  
266 AR output cells would gain a fitness advantage under conditions of androgen  
267 deprivation or pharmacologic AR inhibition, as demonstrated by the enzalutamide  
268 resistance observed in xenograft models.

269           Further work is required to understand the clinical implications of our work  
270 but two findings deserve comment. First, we show that elevated levels of GREB1 in  
271 CRPC tumors correlate with a poor clinical response to enzalutamide, analogous to  
272 the prognostic impact of AR gene amplification. Second, GREB1 knockdown  
273 experiments provide genetic evidence that GREB1 is required for in vivo  
274 enzalutamide resistance in xenograft models. Although pharmacologic strategies to  
275 inhibit GREB1 function are not currently available, a small molecule inhibitor that  
276 blocks protein-protein interactions between the AR N-terminal domain and  
277 CBP/p300 is currently in clinical development (Andersen et al., 2010)

278 (NCT02606123). This work provides precedent that similar strategies to disrupt

279 GREB1/AR interaction may be possible.

280

## 281 **Materials and Methods**

### 282 **Cell lines**

283 LNCaP and MCF7 cell lines were obtained from American Type Culture Collection  
284 (ATCC, Manassas, VA) and maintained in RPMI (LNCaP) or DMEM (MCF7) + 10%  
285 FBS (Omega Scientific, Tarzana, CA). LNCaP/AR cell line was generated and  
286 maintained as previously described (C. D. Chen et al., 2004). CWR22Pc was a gift  
287 from Marja T. Nevalainen (Thomas Jefferson University, Philadelphia, PA) and  
288 CWR22Pc-EP was generated and maintained as previously described (Mu et al.,  
289 2017).

290

### 291 **Flow cytometry analysis and FACS-sorting**

292 Rapidly cycling eGFP AR reporter cells were collected using Accumax dissociation  
293 solution (Innovative Cell Technologies, San Diego, CA), and dead cells were  
294 counterstained with DAPI (Invitrogen, Grand Island, NY). For FACS-sorting of AR-  
295 low and AR-hi cells, 5% of the entire population with lowest and highest eGFP  
296 expression was sorted out using BD FACSAria cell sorter. For flow cytometric  
297 analysis of reporter activity, eGFP expression was measured using the BD-LDRII  
298 flow cytometer and analysis was done using FlowJo software.

299

### 300 **Plasmid construction and cell transduction**

301 The lentiviral eGFP AR reporter (ARR<sub>3</sub>tk-eGFP/SV40-mCherry) was generated by  
302 switching 7xTcf promoter of 7xTcf-eGFP/SV40-mCherry (Addgene, Cambridge, MA,  
303 24304) with probasin promoter containing 3xARE (ARR<sub>3</sub>tk) (Snoek et al., 1998). For

304 shRNA knockdown experiments, SCEP vector was generated by substituting GFP  
305 cassette of SGEP (pRRL-GFP-miRE- PGK-PuroR, gift from Johannes Zuber) (Fellmann  
306 et al., 2013) with mCherry cassette. The following guide sequences were used for  
307 knockdown:

308 shAR.177: TAGTGCAATCATTCTGCTGGC  
309 shGREB1-1: TTGTCAGGAACAGACACTGGTT  
310 shGREB1-2: TTTCAGATTTATATGATTGGAG  
311 shGREB1-3: TTGACAAGATACCTAAAGCCGA  
312 shKLF8.3467: TTGAGTTCTAAAGTTTCTCTGA  
313 shKLF8.2180: TATTTGTCCAAATTTAACCTAA  
314 shKLF8.2684: TTATAAAACAATCTGATTGGGC  
315 shGHRHR.544: TAAAAGTGGTGAACAGCTGGGT  
316 shGHRHR.1571: TTTATTGGCTCCTCTGAGCCTT  
317 shGHRHR.1583: TTCATTTACAGGTTTATTGGCT  
318 shSRC1-1: TTCTTCTTGGAAGTTGTCGTTT  
319 shSRC2-1: TTGCTGAACTTGCTGTTGCTGA  
320 shSRC2-2: TTAACCTTGCTCTTCTCCTTGC

321 shRenilla was previously described as Ren.713 targeting Renilla luciferase  
322 (Fellmann et al., 2013). Pools of 3 shRNAs were used to knockdown GREB1, KLF8  
323 and GHRHR in a small-scale shRNA screen, and shGREB1-1 was used for further  
324 studies. For CRISPR/Cas9 experiments, lentiCRISPRv2 vector gifted by F. Zhang  
325 (Addgene, 52961) was used with the following guide sequences designed using  
326 <http://crispr.mit.edu/> website:



327 SgGREB1-7: AGGCATGTCCTGCGTGCCGC

328 SgGREB1-8: TCACGGGCATACGAGCAGTA

329 sgNT was previously described (T. Wang, Wei, Sabatini, & Lander, 2014). pCMV6-  
330 GREB1 plasmid was a gift from J. Carroll (Cancer Research UK Cambridge Institute,  
331 Cambridge, UK). The lentiviral GREB1 cDNA plasmid was constructed by cloning  
332 GREB1 cDNA from pCMV6-GREB1 into Tet-inducible pLV-based lentiviral  
333 expression vector with HA-tag.

334

335 Lentiviral transduction of cells was performed as described previously (Mu et al.,  
336 2017). To make AR reporter cell line, cells were infected with ARR<sub>3</sub>tk-eGFP/SV40-  
337 mCherry at low multiplicity of infection (MOI) to enable each cell has one copy of  
338 reporter construct, and the transduced cells were sorted by mCherry flow  
339 cytometry. To inactivate GREB1 gene, we single-cell cloned the cells infected with  
340 lentiCRISPRv2 vector containing SgGREB1-7 or SgGREB1-8, and isolated a clone that  
341 had genomic alteration at target sequence. Three clones were generated by using  
342 SgGREB1-7 (SgGREB1-7-2, 7-11 and 7-12) and one clone was generated by using  
343 SgGREB1-8 (SgGREB1-8-2).

344

#### 345 **shRNA screen**

346 FACS-based small-scale shRNA screen with 33 selected genes was performed as  
347 follows: FACS-sorted AR-hi cells were plated in 12 well plate ( $1.5 \times 10^5$  cells per  
348 well, Corning, 353043) and each well was infected with pool of 3 SEPC shRNAs  
349 against each gene on the following day. Cells with stable integration of hairpins

350 were selected with 2  $\mu\text{g}/\text{ml}$  puromycin. 9 days after infection, half of the cells in  
351 each well was used to analyze eGFP AR reporter activity using flow cytometry, and  
352 the other half was subjected to qRT-PCR to determine knockdown level of the gene.  
353 We performed the screen in duplicate and each replicate included wells infected  
354 with shRenilla or shAR as controls. The median fluorescence intensity (MFI) of eGFP  
355 was measured using FlowJo software. The shRNAs decreased eGFP MFI more than  
356 1.5 fold compared to shRenilla (normalized value lower than 0.667) in both  
357 duplicate were considered as hits. The list of 33 genes used in the screen and the  
358 summary of median eGFP intensity can be found at Figure2-source data 2.

359

### 360 **Xenograft assay**

361 To compare time to acquire enzalutamide resistance *in vivo*, FACS-sorted bulk, AR-  
362 low and AR-hi populations derived from LNCaP/AR were cultured for 6 days after  
363 sorting to obtain enough number of cells for xenograft assay.  $2 \times 10^6$  cells were  
364 injected subcutaneously into the flank of castrated CB17 SCID mice in a 50:50 mix of  
365 matrigel (BD Biosciences, San Jose, CA) and regular culture medium (5 mice, 10  
366 tumors per group), and enzalutamide treatment was initiated on the day of  
367 injection. To test the effect of GREB1 knockdown on development of enzalutamide  
368 resistance, FACS-sorted AR-hi population derived from LNCaP/AR was infected with  
369 control or 3 different shGREB1 constructs 2 days after sorting. Cells with stable  
370 integration of hairpin were selected with 2  $\mu\text{g}/\text{ml}$  puromycin. 5 days after infection,  
371  $2 \times 10^6$  cells were injected subcutaneously into the flank of castrated CB17 SCID  
372 mice (5 mice, 10 tumors per group), and enzalutamide treatment was initiated on

373 the day of injection. The same cell populations used for injection were also used to  
374 test eGFP AR reporter activity using flow cytometry, and qRT-PCR to test  
375 knockdown level of GREB1. Measurements were obtained weekly using Peira  
376 TM900 system (Peira bvba, Belgium). All animal experiments were performed in  
377 compliance with the guidelines of the Research Animal Resource Center of the  
378 Memorial Sloan Kettering Cancer Center.

379

### 380 **Immunoblot, immunoprecipitation and immunostaining**

381 Protein was extracted from cells using Triton lysis buffer and quantified by BCA  
382 Protein Assay (ThermoFisher Scientific, Waltham, MA, 23225). Nuclear/cytoplasmic  
383 fractionation was achieved with Subcellular Protein Fractionation Kit  
384 (ThermoFisher Scientific, 78840). Protein lysates were subjected to SDS-PAGE and  
385 immunoblotted with the following antibodies against: AR (Abcam, Cambridge,  
386 United Kingdom, ab108341), PSA (Cell Signaling Technology, Danvers, MA, 5365),  
387 FKBP5 (Cell Signaling, 8245) TRPM8 (Epitomics, Burlingame, CA, 3466-1), tubulin  
388 (Santa Cruz Biotechnology, Dallas, TX, sc-9104), Cyclophilin B (Abcam, ab178397),  
389 BRD4 (Cell Signaling, 13440), TOP2B (Abcam, ab58442), HA (Cell Signaling, 3724).

390

391 For AR immunoprecipitation, at least 1.5 mg of total protein was incubated with AR  
392 antibody (Abcam, ab108341) overnight at 4 °C followed by the addition of Protein  
393 A/G agarose beads (Santa Cruz, sc-2003) for 2 h. Immune complexes were  
394 extensively washed with Triton buffer and solubilized using Laemmli sample buffer  
395 (BioRad, Hercules, CA).

396

397 For immunofluorescence staining, cells were fixed with 4% formaldehyde,  
398 permeabilized with 0.2% Triton-X, blocked with 5% normal goat and 5% normal  
399 horse serum, stained with anti-AR (Santa Cruz, sc-816) primary and Alexa Fluor 647  
400 (Invitrogen) secondary antibodies, and mounted with DAPI mounting solution  
401 (Vector Lab, Burlingame, CA). For Immunohistochemistry, tumor sections were  
402 stained with anti-AR (Agilent, Santa Clara, CA, 441) and PSA (Biogenex, Fremont,  
403 CA) antibodies using Leica Bond RX (Leica Biosystems, Wetzlar, Germany).

404

#### 405 **Transcription analysis**

406 Total RNA was isolated using the QiaShredder kit (Qiagen, Germantown, MD) for cell  
407 lysis and the RNeasy kit (Qiagen) for RNA purification. For quantitative PCR with  
408 reverse transcription (RT-qPCR), we used the High Capacity cDNA Reverse  
409 Transcription Kit (Applied Biosystems, Grand Island, NY) to synthesize cDNA  
410 according to the manufacturer's protocol. Real-time PCR was performed using gene-  
411 specific primers and 2X SYBR green quantfast PCR Mix (Qiagen, 1044154). Data  
412 were analyzed by the DDCT method using GAPDH as a control gene and normalized  
413 to control samples, which were arbitrarily set to 1. To test DHT-induced AR target  
414 gene upregulation, cells were hormone-deprived in 10% charcoal-stripped dextran-  
415 treated fetal bovine serum (Omega Scientific) media for 2 days and then treated  
416 with indicated concentration of DHT for 24 h. Triplicate measurements were made  
417 on at least three biological replicates. The primer sequences used for q-PCR are  
418 listed at Supplementary file 1.

419 For RNA-seq, library preparation, sequencing and expression analysis were  
420 performed by the New York Genome Center. Libraries were prepared using TruSeq  
421 Stranded mRNA Library Preparation Kit in accordance with the manufacturer's  
422 instructions and sequenced on an Illumina HiSeq2500 sequencer (rapid run v2  
423 chemistry) with 50 base pair (bp) reads. Partek® Genomics Suite® software (Partek  
424 Inc, St. Louis, MO) was used to analyze differentially expressed genes between AR-  
425 low vs. AR-hi (Fold change  $\geq 1.5$ ,  $p < 0.05$ ). To analyze RNA-seq data from AR-hi cells  
426 with shRenilla vs. shGREB1, reads were aligned to the NCBI GRCh37 human  
427 reference using STAR aligner (Dobin et al., 2013). Quantification of genes annotated  
428 in Gencode vM2 were performed using featureCounts and quantification of  
429 transcripts using Kalisto (Bray, Pimentel, Melsted, & Pachter, 2016). QC were  
430 collected with Picard and RSeQC (L. Wang, Wang, & Li, 2012)  
431 (<http://broadinstitute.github.io/picard/>). Normalization of feature counts was done  
432 using the DESeq2 package (<http://www-huber.embl.de/users/anders/DESeq/>).  
433 Differentially expressed genes were defined as a 1.5 fold difference,  $p < 0.05$  of  
434 DESeq-normalized expression. For GSEA, statistical analysis was performed with  
435 publicly available software from the Broad Institute  
436 (<http://www.broadinstitute.org/gsea/index.jsp>). The basal and luminal gene  
437 signatures used for GSEA (Supplementary file 2) were generated by conducting  
438 RNA-sequencing with normal human basal vs. luminal prostate cells isolated as  
439 previously described (Karthaus et al., 2014). Full description of this study will be  
440 reported separately.

441

442 **ChIP**

443 ChIP experiments were performed as previously described (Arora et al., 2013),  
444 using SDS-based buffers. Antibodies were used at a concentration of 5 ug per 1 mL  
445 of IP buffer, which encompassed approximately 8 million cells per IP. Antibodies  
446 used were: AR (Santa Cruz, sc-816), p300 (Santa Cruz, sc-585), HA (Abcam,  
447 ab9110), ER (Santa Cruz, sc-8002). The primer sequences used for ChIP-qPCR are  
448 listed at Supplementary Table S8.

449 For ChIP-seq, library preparation and RNA-seq were performed by the NYU  
450 Genome Technology Center. Libraries were made using the KAPA Biosystems Hyper  
451 Library Prep Kit (Kapa Biosystems, Woburn, MA, KK8504), using 10 ng of DNA as  
452 input and 10 PCR cycles for library amplification. The libraries were sequenced on a  
453 HiSeq 2500, as rapid run v2 chemistry, paired-end mode of 51 bp read length.

454 The ChIP-seq reads were aligned to the human genome (hg19, build 37) using the  
455 program BWA (VN: 0.7.12; default parameters) within the PEMapper. Duplicated  
456 reads were marked by the software Picard (VN: 1.124;  
457 <http://broadinstitute.github.io/picard/index.html>) and removed. The software  
458 MACS2 (Feng, Liu, Qin, Zhang, & Liu, 2012) (-q 0.1) was used for peak identification  
459 with data from ChIP input DNAs as controls. Peaks of sizes >100 bp and with at least  
460 one base pair covered by >18 reads were selected as the final high confident peaks.  
461 Peaks from shGREB1/control conditions were all merged to obtain non-overlapping  
462 genomic regions, which were then used to determine conditional specific AR  
463 binding. Overlapped peaks were defined as those sharing at least one base pair. To

464 generate graphs depicting AR ChIP-seq read density in  $\pm 2$  kilobase regions of the AR  
465 peak summits, the same number of ChIP-seq reads from different conditions were  
466 loaded into the software ChAsE (Younesy et al., 2016), and the resulting read  
467 density matrices were sorted by the read densities in the shRenilla control, before  
468 colouring. The read density was also used to select peaks with significant signal  
469 difference between shGREB1 and controls. The criteria for assigning peaks to genes  
470 have been described previously (Rockowitz & Zheng, 2015). The MEME-ChIP  
471 software (Machanick & Bailey, 2011) was applied to 300-bp sequences around the  
472 peak summits for motif discovery, and the comparison of sequence motifs was also  
473 analyzed with HOMER (<http://homer.ucsd.edu/homer/>).

#### 474 **Analysis of human prostate cancer datasets**

475 All analysis of human prostate cancer data was conducted using previously  
476 published datasets of The Cancer Genome Atlas (TCGA) (Cancer Genome Atlas  
477 Research, 2015) and PCF/SU2C (Robinson et al., 2015), which can be explored in the  
478 cBioPortal for Cancer Genomics (<http://www.cbioportal.org>).

#### 479 **Statistics**

480 For comparison of pooled data between two different groups, unpaired t tests were  
481 used to determine significance. For comparison of data among three groups, one-  
482 way ANOVA was used to determine significance. In vitro assays represent three  
483 independent experiments from biological replicates, unless otherwise indicated. In  
484 all figures, \* $P < 0.05$ , \*\* $P < 0.01$  and \*\*\* $P < 0.001$ . For GSEA, statistical analysis was

485 performed with publicly available software from the Broad Institute  
486 (<http://www.broadinstitute.org/gsea/index.jsp>). The sample size estimate was  
487 based on our experience with previous experiments (Balbas et al., 2013; Bose et al.,  
488 2017; Y. Chen et al., 2013). No formal randomization process was used to assign  
489 mice to a given xenograft assay, and experimenters were not blinded.

#### 490 **Acknowledgments**

491 We thank the flow cytometry core facility at MSKCC for technical support, NYU  
492 Genome Technology Center for conducting ChIP-seq, New York Genome  
493 Center for conducting the RNA-seq, MSKCC Pathology Core for assistance  
494 with IHC staining of patient samples, Wouter Karthaus for help with cloning and  
495 providing the basal and luminal gene signature, Wassim Abida for help with  
496 analyzing patient data, Kayla Lawrence and Tejasveeta Nadkarni for help with  
497 cloning and Jason Carroll (Cancer Research UK Cambridge Institute) for generously  
498 providing pCMV6-GREB1 plasmid, and the members of the Sawyers laboratory for  
499 helpful discussions.

#### 500 **Disclosure Statement**

501 Charles L Sawyers: Senior Editor eLife; Board of Directors of Novartis; co-founder of  
502 ORIC Pharm; co-inventor of enzalutamide and apalutamide; Science advisor to  
503 Agios, Beigene, Blueprint, Column Group, Foghorn, Housey Pharma, Nextech, KSQ,  
504 Petra and PMV; co-founder of Seragon, purchased by Genentech/Roche in 2014.  
505 John Wongvipat is a co-inventor of enzalutamide.



506 **References**

507

- 508 Andersen, R. J., Mawji, N. R., Wang, J., Wang, G., Haile, S., Myung, J. K., . . . Sadar, M. D.  
509 (2010). Regression of castrate-recurrent prostate cancer by a small-molecule  
510 inhibitor of the amino-terminus domain of the androgen receptor. *Cancer*  
511 *Cell*, 17(6), 535-546. doi:10.1016/j.ccr.2010.04.027
- 512 Annala, M., Vandekerkhove, G., Khalaf, D., Taavitsainen, S., Beja, K., Warner, E. W., . . .  
513 Chi, K. N. (2018). Circulating Tumor DNA Genomics Correlate with Resistance  
514 to Abiraterone and Enzalutamide in Prostate Cancer. *Cancer Discov*, 8(4),  
515 444-457. doi:10.1158/2159-8290.CD-17-0937
- 516 Arora, V. K., Schenkein, E., Murali, R., Subudhi, S. K., Wongvipat, J., Balbas, M. D., . . .  
517 Sawyers, C. L. (2013). Glucocorticoid receptor confers resistance to  
518 antiandrogens by bypassing androgen receptor blockade. *Cell*, 155(6), 1309-  
519 1322. doi:10.1016/j.cell.2013.11.012
- 520 Balbas, M. D., Evans, M. J., Hosfield, D. J., Wongvipat, J., Arora, V. K., Watson, P. A., . . .  
521 Sawyers, C. L. (2013). Overcoming mutation-based resistance to  
522 antiandrogens with rational drug design. *Elife*, 2, e00499.  
523 doi:10.7554/eLife.00499
- 524 Berger, M. F., Lawrence, M. S., Demichelis, F., Drier, Y., Cibulskis, K., Sivachenko, A. Y.,  
525 . . . Garraway, L. A. (2011). The genomic complexity of primary human  
526 prostate cancer. *Nature*, 470(7333), 214-220. doi:10.1038/nature09744
- 527 Bose, R., Karthaus, W. R., Armenia, J., Abida, W., Iaquinta, P. J., Zhang, Z., . . . Sawyers,  
528 C. L. (2017). ERF mutations reveal a balance of ETS factors controlling  
529 prostate oncogenesis. *Nature*, 546(7660), 671-675.  
530 doi:10.1038/nature22820
- 531 Bray, N. L., Pimentel, H., Melsted, P., & Pachter, L. (2016). Near-optimal probabilistic  
532 RNA-seq quantification. *Nat Biotechnol*, 34(5), 525-527.  
533 doi:10.1038/nbt.3519
- 534 Cancer Genome Atlas Research, Network. (2015). The Molecular Taxonomy of  
535 Primary Prostate Cancer. *Cell*, 163(4), 1011-1025.  
536 doi:10.1016/j.cell.2015.10.025
- 537 Chen, C. D., Welsbie, D. S., Tran, C., Baek, S. H., Chen, R., Vessella, R., . . . Sawyers, C. L.  
538 (2004). Molecular determinants of resistance to antiandrogen therapy. *Nat*  
539 *Med*, 10(1), 33-39. doi:10.1038/nm972
- 540 Chen, Y., Chi, P., Rockowitz, S., Iaquinta, P. J., Shamu, T., Shukla, S., . . . Sawyers, C. L.  
541 (2013). ETS factors reprogram the androgen receptor cistrome and prime  
542 prostate tumorigenesis in response to PTEN loss. *Nat Med*, 19(8), 1023-1029.  
543 doi:10.1038/nm.3216
- 544 Culig, Z., Hoffmann, J., Erdel, M., Eder, I. E., Hobisch, A., Hittmair, A., . . . Klocker, H.  
545 (1999). Switch from antagonist to agonist of the androgen receptor  
546 bicalutamide is associated with prostate tumour progression in a new model  
547 system. *Br J Cancer*, 81(2), 242-251. doi:10.1038/sj.bjc.6690684
- 548 Dobin, A., Davis, C. A., Schlesinger, F., Drenkow, J., Zaleski, C., Jha, S., . . . Gingeras, T. R.  
549 (2013). STAR: ultrafast universal RNA-seq aligner. *Bioinformatics*, 29(1), 15-  
550 21. doi:10.1093/bioinformatics/bts635

- 551 Fellmann, C., Hoffmann, T., Sridhar, V., Hopfgartner, B., Muhar, M., Roth, M., . . . Zuber,  
552 J. (2013). An optimized microRNA backbone for effective single-copy RNAi.  
553 *Cell Rep*, 5(6), 1704-1713. doi:10.1016/j.celrep.2013.11.020
- 554 Feng, J., Liu, T., Qin, B., Zhang, Y., & Liu, X. S. (2012). Identifying ChIP-seq enrichment  
555 using MACS. *Nat Protoc*, 7(9), 1728-1740. doi:10.1038/nprot.2012.101
- 556 Geng, C., He, B., Xu, L., Barbieri, C. E., Eedunuri, V. K., Chew, S. A., . . . Mitsiades, N.  
557 (2013). Prostate cancer-associated mutations in speckle-type POZ protein  
558 (SPOP) regulate steroid receptor coactivator 3 protein turnover. *Proc Natl  
559 Acad Sci U S A*, 110(17), 6997-7002. doi:10.1073/pnas.1304502110
- 560 Groner, A. C., Cato, L., de Tribolet-Hardy, J., Bernasocchi, T., Janouskova, H., Melchers,  
561 D., . . . Brown, M. (2016). TRIM24 Is an Oncogenic Transcriptional Activator in  
562 Prostate Cancer. *Cancer Cell*, 29(6), 846-858. doi:10.1016/j.ccell.2016.04.012
- 563 Hieronymus, H., Lamb, J., Ross, K. N., Peng, X. P., Clement, C., Rodina, A., . . . Golub, T.  
564 R. (2006). Gene expression signature-based chemical genomic prediction  
565 identifies a novel class of HSP90 pathway modulators. *Cancer Cell*, 10(4),  
566 321-330. doi:10.1016/j.ccr.2006.09.005
- 567 Karthaus, W. R., Iaquinta, P. J., Drost, J., Gracanin, A., van Boxtel, R., Wongvipat, J., . . .  
568 Clevers, H. C. (2014). Identification of multipotent luminal progenitor cells in  
569 human prostate organoid cultures. *Cell*, 159(1), 163-175.  
570 doi:10.1016/j.cell.2014.08.017
- 571 Lee, K. C., & Lee Kraus, W. (2001). Nuclear receptors, coactivators and chromatin:  
572 new approaches, new insights. *Trends Endocrinol Metab*, 12(5), 191-197.
- 573 Leo, C., & Chen, J. D. (2000). The SRC family of nuclear receptor coactivators. *Gene*,  
574 245(1), 1-11.
- 575 Machanick, P., & Bailey, T. L. (2011). MEME-ChIP: motif analysis of large DNA  
576 datasets. *Bioinformatics*, 27(12), 1696-1697.  
577 doi:10.1093/bioinformatics/btr189
- 578 Mohammed, H., D'Santos, C., Serandour, A. A., Ali, H. R., Brown, G. D., Atkins, A., . . .  
579 Carroll, J. S. (2013). Endogenous purification reveals GREB1 as a key estrogen  
580 receptor regulatory factor. *Cell Rep*, 3(2), 342-349.  
581 doi:10.1016/j.celrep.2013.01.010
- 582 Mu, P., Zhang, Z., Benelli, M., Karthaus, W. R., Hoover, E., Chen, C. C., . . . Sawyers, C. L.  
583 (2017). SOX2 promotes lineage plasticity and antiandrogen resistance in  
584 TP53- and RB1-deficient prostate cancer. *Science*, 355(6320), 84-88.  
585 doi:10.1126/science.aah4307
- 586 Podolak, Jennifer, Eilers, Kristi, Newby, Timothy, Slottke, Rachel, Tucker, Erin, B  
587 Olson, Susan, . . . Thomas, George. (2017). *Androgen receptor amplification is  
588 concordant between circulating tumor cells and biopsies from men undergoing  
589 treatment for metastatic castration resistant prostate cancer.*
- 590 Pomerantz, M. M., Li, F., Takeda, D. Y., Lenci, R., Chonkar, A., Chabot, M., . . .  
591 Freedman, M. L. (2015). The androgen receptor cistrome is extensively  
592 reprogrammed in human prostate tumorigenesis. *Nat Genet*, 47(11), 1346-  
593 1351. doi:10.1038/ng.3419
- 594 Qin, J., Liu, X., Laffin, B., Chen, X., Choy, G., Jeter, C. R., . . . Tang, D. G. (2012). The PSA(-  
595 /lo) prostate cancer cell population harbors self-renewing long-term tumor-

- 596 propagating cells that resist castration. *Cell Stem Cell*, 10(5), 556-569.  
597 doi:10.1016/j.stem.2012.03.009
- 598 Rae, J. M., Johnson, M. D., Scheys, J. O., Cordero, K. E., Larios, J. M., & Lippman, M. E.  
599 (2005). GREB 1 is a critical regulator of hormone dependent breast cancer  
600 growth. *Breast Cancer Res Treat*, 92(2), 141-149. doi:10.1007/s10549-005-  
601 1483-4
- 602 Robinson, D., Van Allen, E. M., Wu, Y. M., Schultz, N., Lonigro, R. J., Mosquera, J. M., . . .  
603 Chinnaiyan, A. M. (2015). Integrative clinical genomics of advanced prostate  
604 cancer. *Cell*, 161(5), 1215-1228. doi:10.1016/j.cell.2015.05.001
- 605 Rockowitz, S., & Zheng, D. (2015). Significant expansion of the REST/NRSF cistrome  
606 in human versus mouse embryonic stem cells: potential implications for  
607 neural development. *Nucleic Acids Res*, 43(12), 5730-5743.  
608 doi:10.1093/nar/gkv514
- 609 Ruizeveld de Winter, J. A., Janssen, P. J., Sleddens, H. M., Verleun-Mooijman, M. C.,  
610 Trapman, J., Brinkmann, A. O., . . . van der Kwast, T. H. (1994). Androgen  
611 receptor status in localized and locally progressive hormone refractory  
612 human prostate cancer. *Am J Pathol*, 144(4), 735-746.
- 613 Shen, M. M., & Abate-Shen, C. (2010). Molecular genetics of prostate cancer: new  
614 prospects for old challenges. *Genes Dev*, 24(18), 1967-2000.  
615 doi:10.1101/gad.1965810
- 616 Snoek, R., Bruchovsky, N., Kasper, S., Matusik, R. J., Gleave, M., Sato, N., . . . Rennie, P.  
617 S. (1998). Differential transactivation by the androgen receptor in prostate  
618 cancer cells. *Prostate*, 36(4), 256-263.
- 619 Takayama, K., Suzuki, T., Tsutsumi, S., Fujimura, T., Takahashi, S., Homma, Y., . . .  
620 Inoue, S. (2014). Integrative analysis of FOXP1 function reveals a tumor-  
621 suppressive effect in prostate cancer. *Mol Endocrinol*, 28(12), 2012-2024.  
622 doi:10.1210/me.2014-1171
- 623 Taylor, B. S., Schultz, N., Hieronymus, H., Gopalan, A., Xiao, Y., Carver, B. S., . . . Gerald,  
624 W. L. (2010). Integrative genomic profiling of human prostate cancer. *Cancer*  
625 *Cell*, 18(1), 11-22. doi:10.1016/j.ccr.2010.05.026
- 626 Wang, L., Wang, S., & Li, W. (2012). RSeQC: quality control of RNA-seq experiments.  
627 *Bioinformatics*, 28(16), 2184-2185. doi:10.1093/bioinformatics/bts356
- 628 Wang, Q., Carroll, J. S., & Brown, M. (2005). Spatial and temporal recruitment of  
629 androgen receptor and its coactivators involves chromosomal looping and  
630 polymerase tracking. *Mol Cell*, 19(5), 631-642.  
631 doi:10.1016/j.molcel.2005.07.018
- 632 Wang, T., Wei, J. J., Sabatini, D. M., & Lander, E. S. (2014). Genetic screens in human  
633 cells using the CRISPR-Cas9 system. *Science*, 343(6166), 80-84.  
634 doi:10.1126/science.1246981
- 635 Watson, P. A., Arora, V. K., & Sawyers, C. L. (2015). Emerging mechanisms of  
636 resistance to androgen receptor inhibitors in prostate cancer. *Nat Rev Cancer*,  
637 15(12), 701-711. doi:10.1038/nrc4016
- 638 Younesy, H., Nielsen, C. B., Lorincz, M. C., Jones, S. J., Karimi, M. M., & Moller, T.  
639 (2016). ChAsE: chromatin analysis and exploration tool. *Bioinformatics*,  
640 32(21), 3324-3326. doi:10.1093/bioinformatics/btw382
- 641

642 **Figure legends**

643

644 **Figure 1. Characterization of LNCaP prostate cancer cells with low vs. high AR**

645 **output. (A)** The reporter cell lines were generated by infecting the cells with the

646 lentivirus containing eGFP AR reporter construct (details can be found in methods).

647 Cells stably integrated with the construct were sorted out by mCherry flow

648 cytometry. **(B)** The variable AR reporter activity (green) in LNCaP cells. Cells were

649 also stained with AR (magenta) and DAPI (blue). **(C)** LNCaP cells with low (AR-low)

650 and high (AR-hi) AR activities were sorted out using flow cytometry based on eGFP

651 AR-reporter expression. **(D-E)** AR-hi cells have higher AR output while having same

652 level of AR. The q-PCR data (D) presented as mean fold change  $\pm$  SD relative to bulk

653 population. **(F)** Gene set enrichment analysis (GSEA) shows that the gene sets up-

654 and down-regulated by androgen are enriched in AR-hi and AR-low cells,

655 respectively. **(G)** AR-low and AR-hi cells maintain their AR activities over time. **(H)**

656 AR-hi cells showed enhanced up-regulation of AR target genes in response to DHT

657 treatment. The q-PCR data presented as mean fold change  $\pm$  SD relative to DMSO

658 control. **(I)** LNCaP/AR xenografts derived from AR-hi cells become resistant to

659 enzalutamide faster than other populations. The bulk, sorted AR-low and AR-hi cells

660 were injected into castrated mice and the mice were treated with enzalutamide

661 immediately after injection. Data presented as mean  $\pm$  SEM (N=10). \* $P$ <0.05 (One-

662 way ANOVA).

663

664 **Figure 2. Knockdown of the three AR regulated genes, GREB1, GHRHR and**  
665 **KLF8, inhibited AR activity in cells with high AR activity. (A)** Gene set  
666 enrichment analysis (GSEA) shows that genes upregulated in human prostate  
667 luminal and basal cells are enriched in AR-hi and AR-low cells, respectively. **(B)** The  
668 schematic of knockdown study with 33 selected genes upregulated in AR-hi cells.  
669 Details can be found in methods. **(C)** The flow cytometry results show that the  
670 knockdown of GREB1, GHRHR and KLF8 inhibited AR reporter activity. Top: The  
671 flow cytometry plot of one of the duplicate assays is shown. Bottom: The normalized  
672 median fluorescence intensity (MFI) of eGFP reporter in each assay is shown. AR  
673 shRNA was used as a control. ACPP knockdown result was shown as a  
674 representative hairpin that had no affect on reporter activity. **(D)** The knockdown  
675 level of AR, GREB1, GHRHR, KLF8 and ACPP in (C). The q-PCR data presented as  
676 mean fold change  $\pm$  SD relative to shRenilla control. **(E)** The transcription of GREB1,  
677 GHRHR and KLF8 is regulated by androgen. The data presented as mean fold change  
678  $\pm$  SD relative to DMSO control. **(F)** Graph showing AR score of each TCGA primary  
679 prostate tumor. Red and blue points are tumors with lowest (AR-low) and highest  
680 (AR-hi) AR score, respectively (5% of 333 cases: 17 cases each). **(G)** The RNA levels  
681 of GREB1, GHRHR and KLF8 are compared between AR-low vs. AR-hi TCGA cases  
682 (data represent mean  $\pm$  SD, unpaired *t*-test). **(H)** The GREB1 function is inhibited by  
683 CRISPR/Cas9 in four LNCaP sublines. (Top) AR reporter activity is inhibited in all  
684 four GREB1 CRISPR cell lines compared to control (SgNT). (Bottom) The example of  
685 genomic alteration in target sequence at each cell line is shown. **(I)** The

686 CRISPR/Cas9-mediated inhibition of GREB1 suppressed PSA expression without  
687 affecting AR level.

688

689 **Figure 3. GREB1 amplifies AR transcriptional activity by enhancing AR binding**

690 **to chromatin.** (A) GREB1 overexpression in AR-low cells with stable integration of

691 GREB1 vector containing HA-tag. (B) AR-low cells with GREB1 overexpression show

692 higher induction of AR target genes in response to DHT treatment. The q-PCR data

693 presented as mean fold change  $\pm$  SD relative to DMSO control. (C) GREB1

694 overexpression in AR-low cells increases protein levels of AR target genes without

695 affecting AR level. (D) Co-immunoprecipitation study using nuclear extract shows

696 interaction between AR and GREB1 (HA). (E) ChIP against HA-tag shows GREB1

697 binding on PSA and FKBP5 enhancer regions. (F-G) AR-hi cells have increased p300

698 binding on PSA and FKBP5 enhancer regions in a GREB1 dependent manner. (H)

699 GREB1 knockdown or CRISPR decreases AR binding to PSA enhancer in AR-hi cells.

700 The ChIP q-PCR data presented as mean percentage input  $\pm$  SD. (I) Overlap of AR

701 ChIP-sequencing peaks shows that AR peaks are disrupted by GREB1 knockdown in

702 AR-hi cells. (J) ChIP-sequencing summary plot shows that AR enrichment across the

703 AR binding sites is reduced by GREB1 knockdown. (K) Example AR peaks on NKX3-

704 1 gene.

705

706 **Figure 4. GREB1 is the major molecular determinant of AR-hi cells.** (A-B)

707 Knockdown of GREB1 inhibited AR target gene expression in AR-hi cells. The q-PCR

708 data (A) presented as mean fold change  $\pm$  SD relative to shRenilla control. (C)

709 Knockdown of GREB1 suppressed the enhanced AR transcriptional activity in AR-hi  
710 cells. The q-PCR data presented as mean fold change  $\pm$  SD relative to DMSO control.  
711 **(D)** Gene set enrichment analysis (GSEA) shows that the gene sets up- and down-  
712 regulated by androgen are enriched in AR-hi control and GREB1 knockdown cells,  
713 and genes upregulated in human prostate luminal and basal cells are enriched in  
714 AR-hi control and GREB1 depleted cells, respectively. **(E)** The venn diagram showing  
715 that 70.5% of DHT-induced genes in control AR-hi cells was inhibited by GREB1  
716 knockdown. **(F)** The venn diagram showing that 64% of top 100 gene sets enriched  
717 in AR-low overlaps with top 100 gene sets enriched in GREB1 depleted AR-hi cells.  
718 **(G)** Knockdown of GREB1 inhibited development of enzalutamide-resistant  
719 LNCaP/AR xenografts derived from AR-hi cells. The sorted AR-hi cells were infected  
720 with control or 3 different shRNAs targeting GREB1 and injected into castrated  
721 mice. Mice were treated with enzalutamide immediately after injection. Data  
722 presented as mean  $\pm$  SEM (N=10). \* $P$ <0.05, \*\* $P$ <0.01 (One-way ANOVA). **(H)** The  
723 SU2C cases received enzalutamide (Enz) have increased level of GREB1 (unpaired  $t$ -  
724 test).

725

726 **Figure 1-figure supplement 1. Characterization of CWR22Pc-EP prostate**  
727 **cancer cells with low vs. high AR output.** **(A)** CWR22Pc-EP cells with low (AR-  
728 low) and high (AR-hi) AR activities were sorted out using flow cytometry based on  
729 eGFP AR-reporter expression. **(B-C)** CWR22Pc-EP AR-hi cells have higher AR output  
730 while having same level of AR. The q-PCR data **(B)** presented as mean fold change  $\pm$   
731 SD relative to bulk population. **(D)** CWR22Pc-EP AR-low and AR-hi cells maintain

732 their AR activities over time. (E) CWR22Pc-EP AR-hi cells have enhanced DHT-  
733 induced AR transcriptional activity compared to AR-low cells. The q-PCR data  
734 presented as mean fold change  $\pm$  SD relative to DMSO control.

735

736 **Figure 1-figure supplement 2. LNCaP AR-low and AR-hi cells have comparable**  
737 **nuclear AR level. The BRD4 and tubulin were used as nuclear and cytoplasmic**  
738 **loading controls, respectively.**

739

740 **Figure 1-figure supplement 3. Characterization of LNCaP/AR prostate cancer**  
741 **cells with low vs. high AR output. (A-C) LNCaP/AR cells with low (AR-low) and**  
742 **high (AR-hi) AR activities were sorted out using flow cytometry based on eGFP AR-**  
743 **reporter expression. The AR reporter activity (A) and AR target gene expression (B-**  
744 **C) were analyzed 7 days post sorting.**

745

746 **Figure 1-figure supplement 4. AR and PSA staining in untreated localized**  
747 **prostate cancer shows heterogeneous PSA staining that is not strictly**  
748 **correlated with AR level.**

749

750 **Figure 2-figure supplement 1. Inhibition of GREB1 suppresses AR**  
751 **transcriptional activity in CWR22Pc-EP cells. (A) GREB1 is upregulated in**  
752 **CWR22Pc-EP AR-hi cells. (B) Knockdown of GREB1 in CWR22Pc-EP AR-hi cells**  
753 **inhibited AR reporter activity.**

754



755 **Figure 3-figure supplement 1. GREB1 amplifies AR transcriptional activity in**  
756 **CWR22Pc-EP cells. (A)** GREB1 overexpression in AR-low cells with stable  
757 integration of GREB1 vector containing HA-tag. **(B)** AR-low cells with GREB1  
758 overexpression show higher induction of AR target genes in response to DHT  
759 treatment. The q-PCR data presented as mean fold change  $\pm$  SD relative to DMSO  
760 control.

761

762 **Figure 3-figure supplement 2. GREB1 enhances AR binding to chromatin. (A-B)**  
763 GREB1 overexpression promotes p300 (A) and AR (B) binding to PSA and FKBP5  
764 enhancer regions in LNCaP AR-low cells. The ChIP q-PCR data presented as mean  
765 percentage input  $\pm$  SD. **(C-D)** The location (C) and motif (D) analysis of the AR ChIP-  
766 sequencing data shows no difference between peaks affected and not affected by  
767 GREB1 knockdown. **(E-F)** GREB1 knockdown has no effect on total (E) and nuclear  
768 (F) AR level in both LNCaP AR-low and AR-hi cells. The BRD4 and tubulin were used  
769 as nuclear and cytoplasmic loading controls, respectively.

770

771 **Figure 3-figure supplement 3. GREB1 has unique function compared to ER or**  
772 **SRC-1 and SRC-2. (A-B)** Knockdown of GREB1 in MCF7 cells inhibits ER target gene  
773 expression (A), but has no affect on ER recruitment to binding sites (B). **(C-E)**  
774 Knockdown of both SRC1 and SRC2 in LNCaP AR-hi cells inhibits AR reporter  
775 activity (C) and AR target gene expression (D), but does not affect AR binding on  
776 PSA and FKBP5 enhancer regions (E).

777

778 **Figure 4-figure supplement 1. Knockdown of GREB1 inhibits AR signaling. (A-**  
779 **B)** Knockdown of GREB1 inhibited AR target gene expression in CWR22Pc-EP AR-hi  
780 cells. **(C)** The heatmap generated from the RNA-sequencing data shows that the  
781 expression of 20 AR target genes used to calculate AR score is suppressed by GREB1  
782 knockdown in LNCaP AR-hi cells. **(D-E)** Knockdown of GREB1 in AR-hi cells derived  
783 from LNCaP/AR inhibited AR reporter activity **(D)** and expression of AR target genes  
784 **(E).**

785 **Source data and Supplementary files**

786

787 **Figure1-source data 1:** GSEA Results (AR-low vs. AR-hi)

788

789 **Figure2-source data 1:** Differentially expressed genes between AR-low vs. AR-hi

790

791 **Figure2-source data 2:** Summary of Median eGFP Intensity of small-scale shRNA

792 screen

793

794 **Figure4-source data 1:** Upregulated genes in AR-hi shRenilla DHT vs. veh

795

796 **Figure4-source data 2:** Upregulated genes in AR-hi shGREB1 DHT vs. veh

797

798 **Figure4-source data 3:** GSEA Results (AR-hi shRenilla DHT vs. shGREB1 DHT)

799

800 **Supplementary file 1:** Primer list

801

802 **Supplementary file 2:** The basal and luminal gene signatures used for GSEA

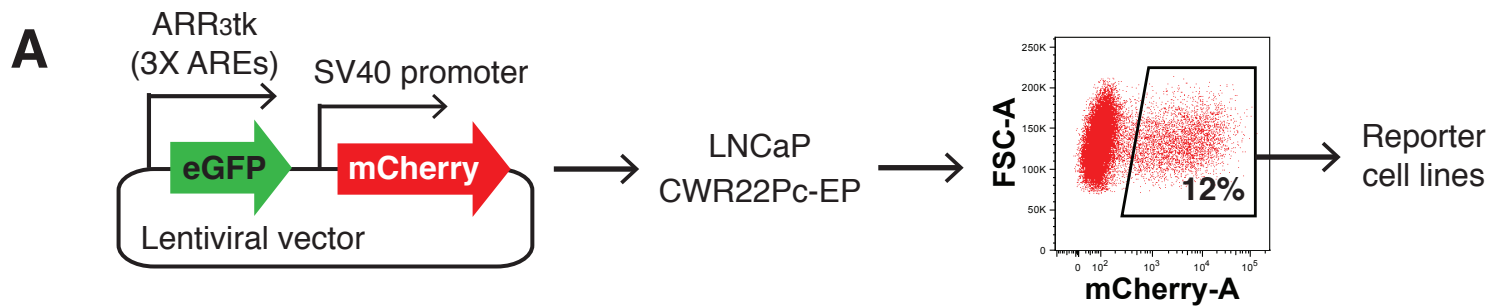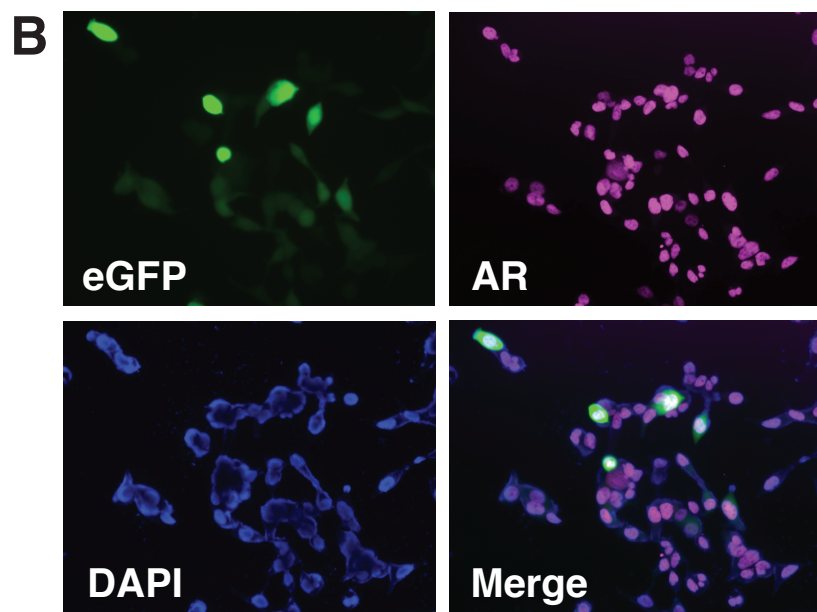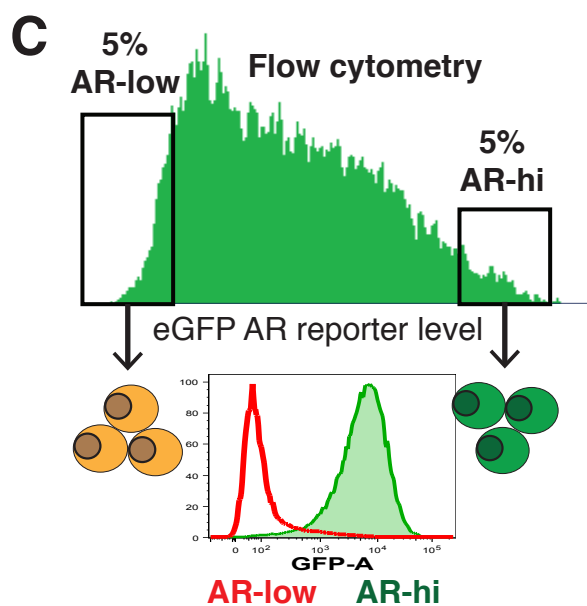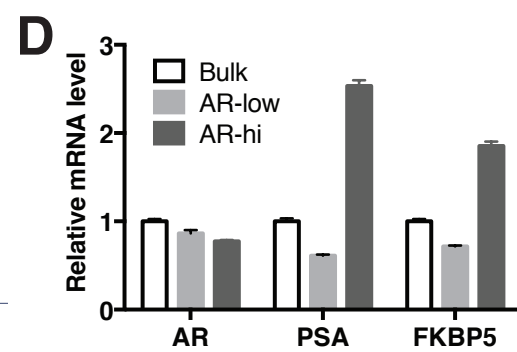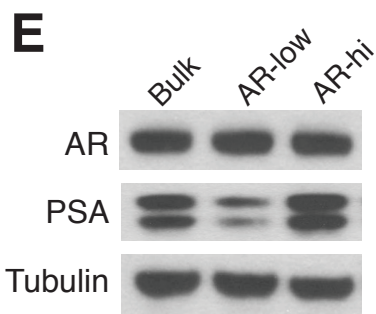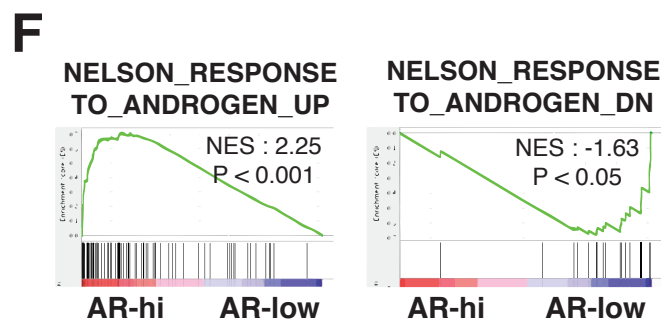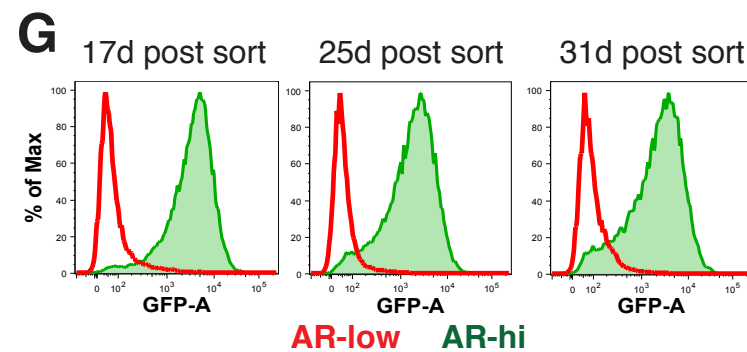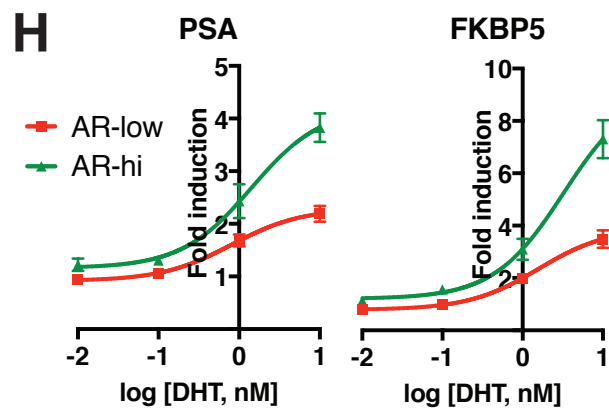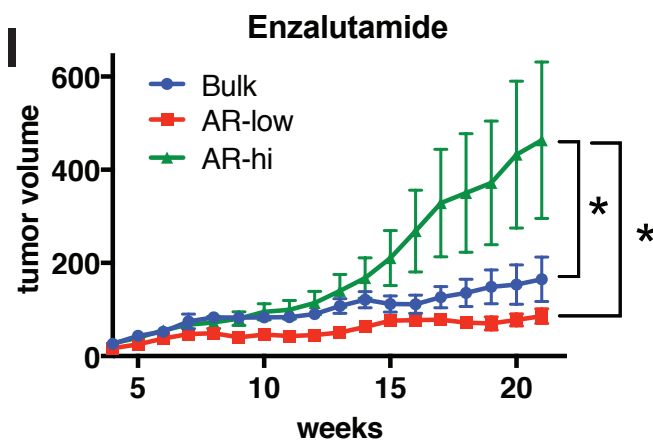

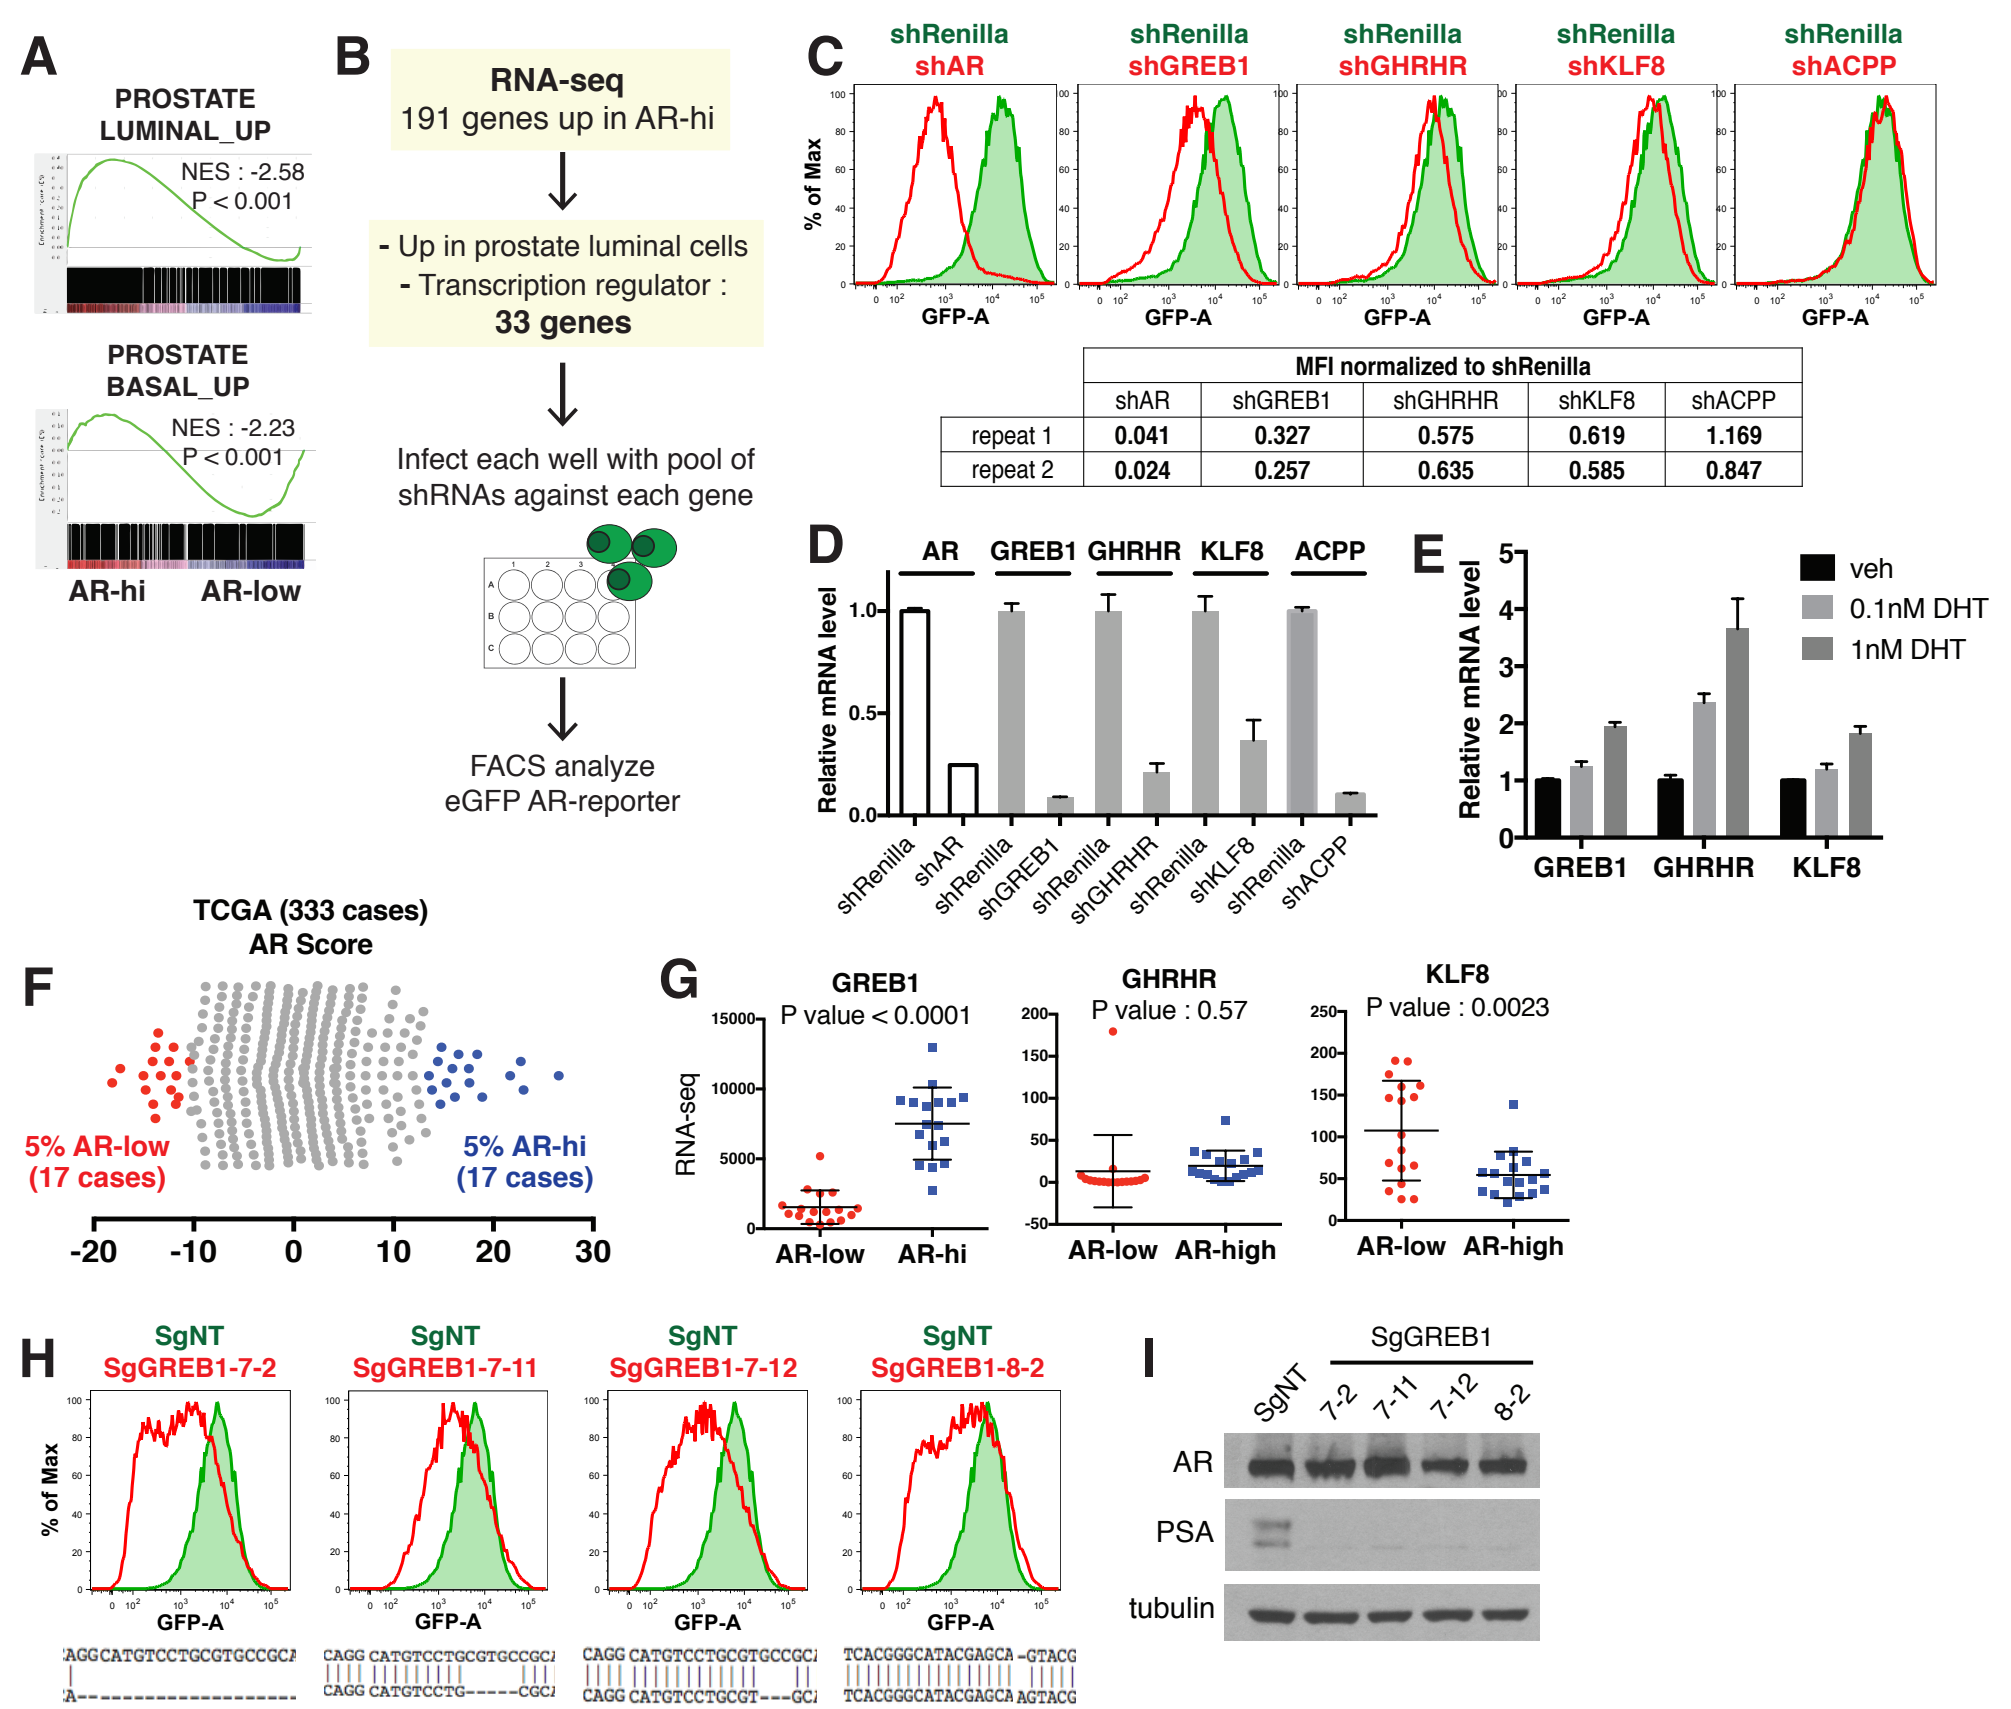

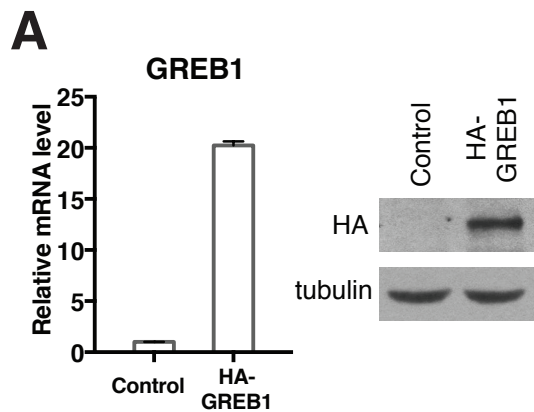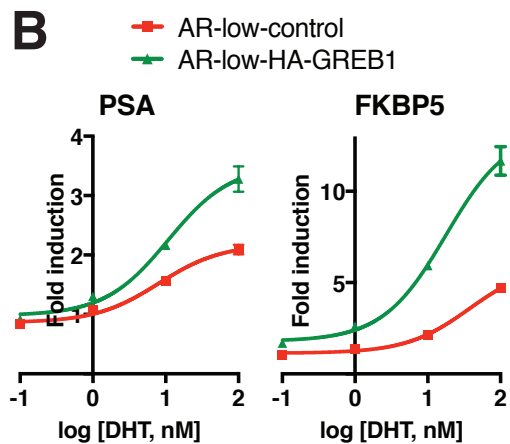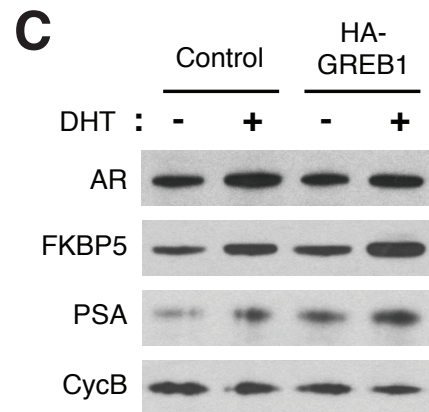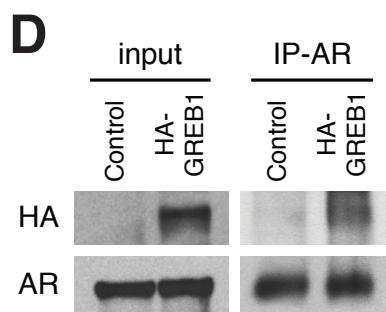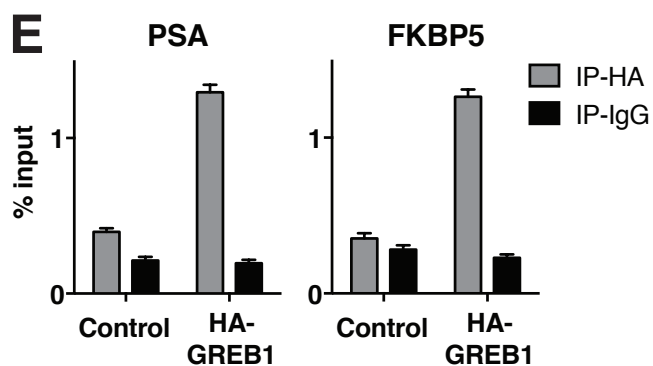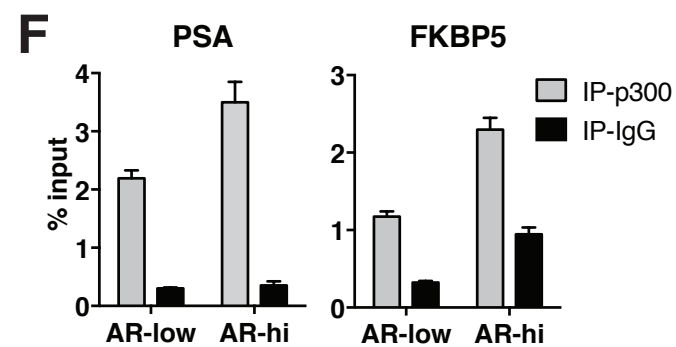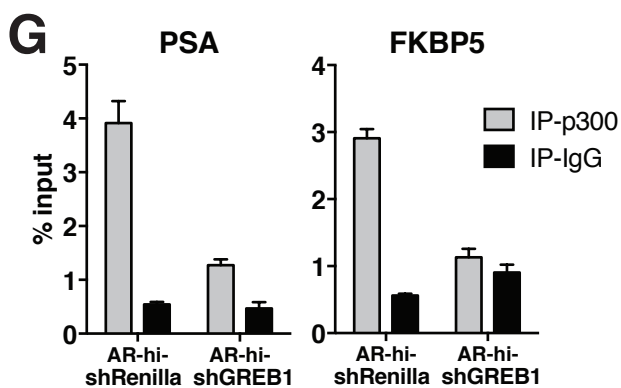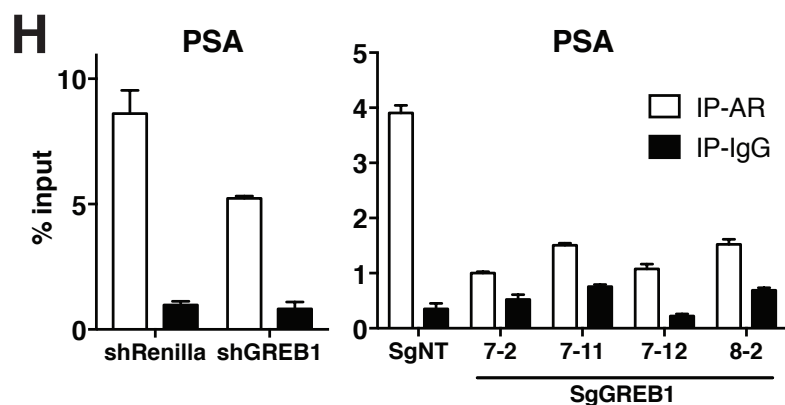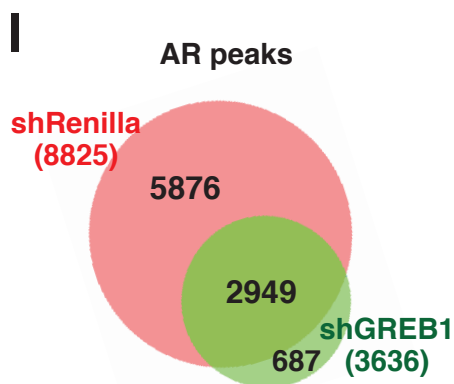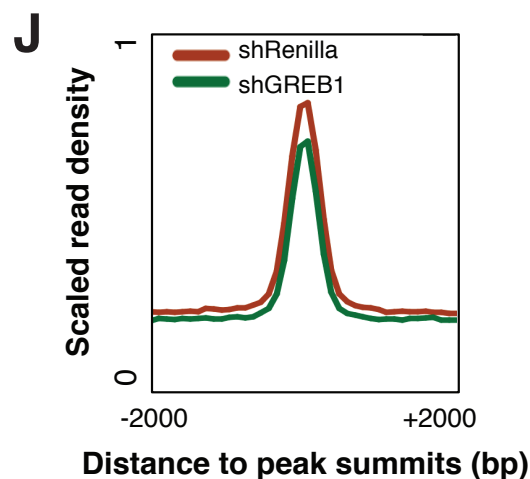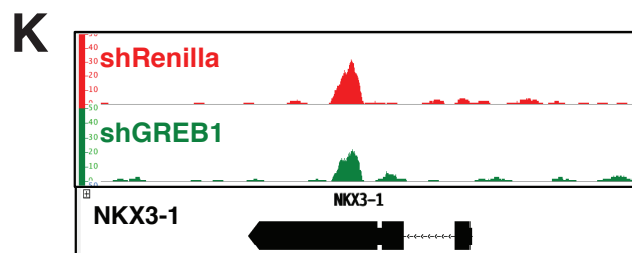

**A**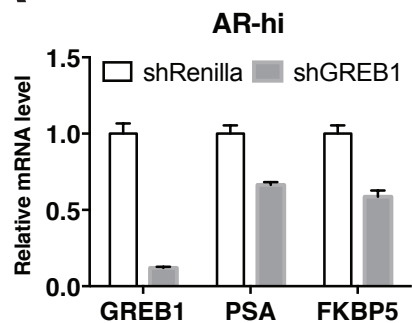**B**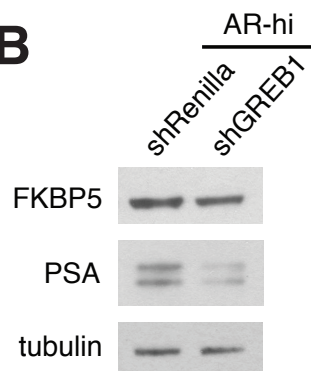**C**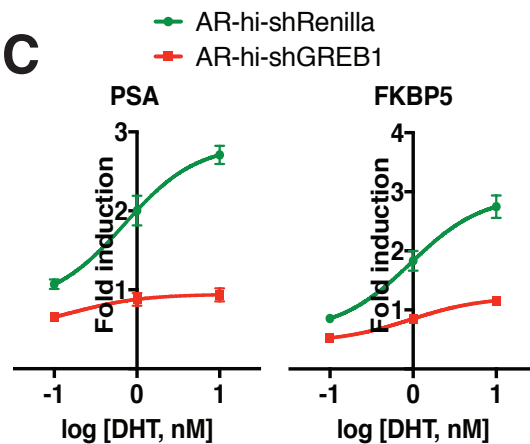**D**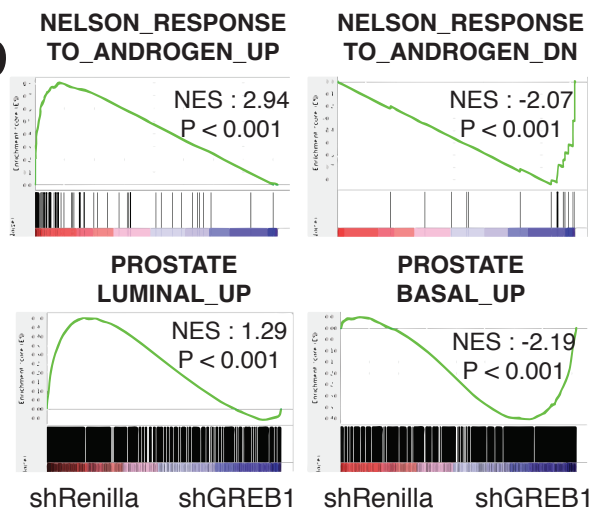**E**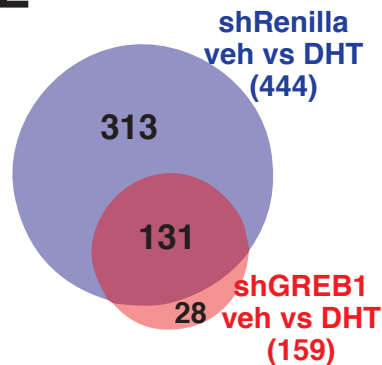**F**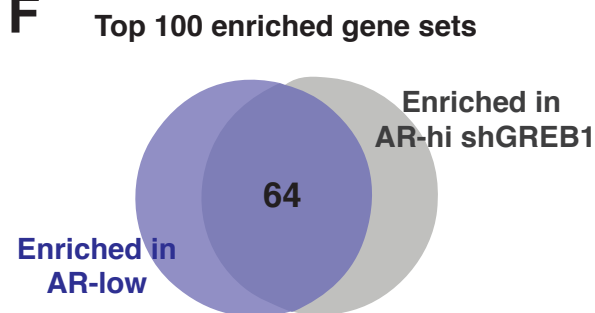**G**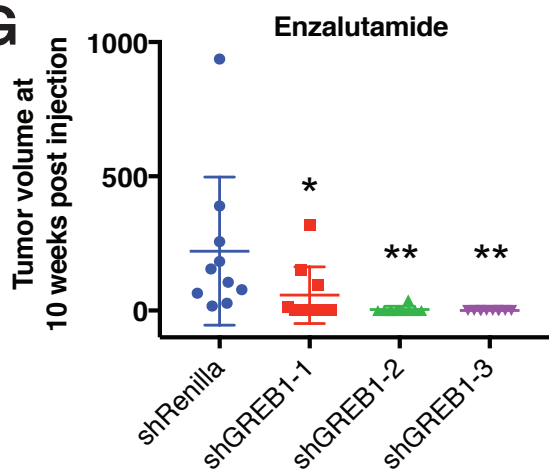**H**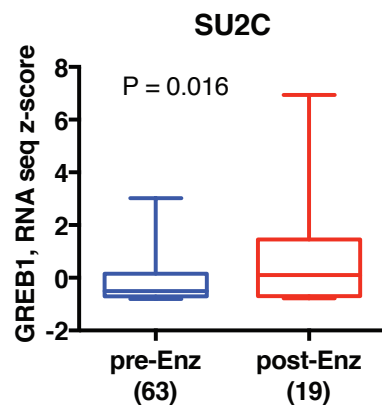

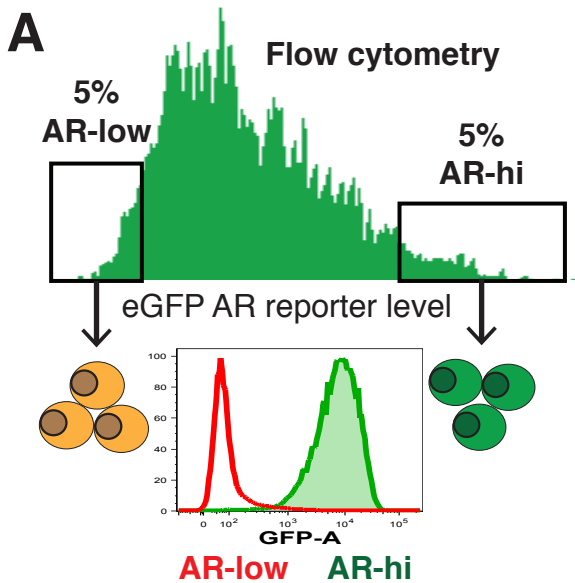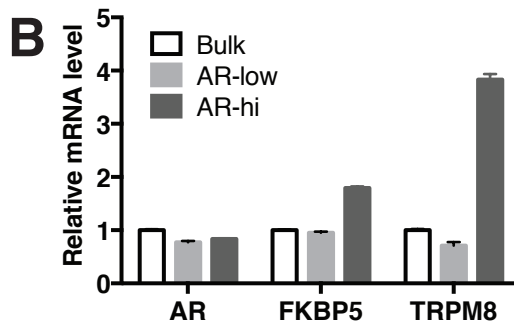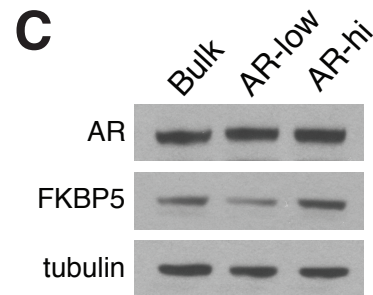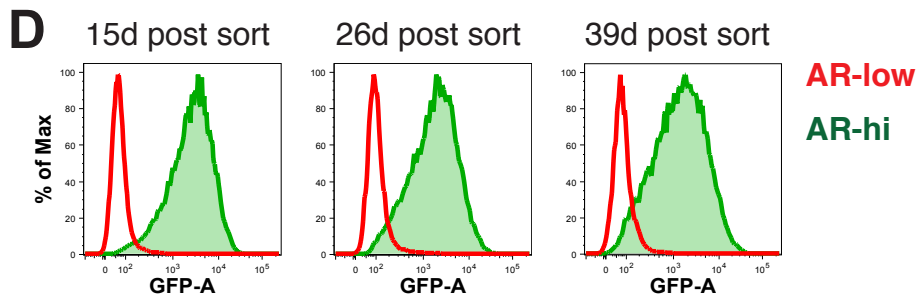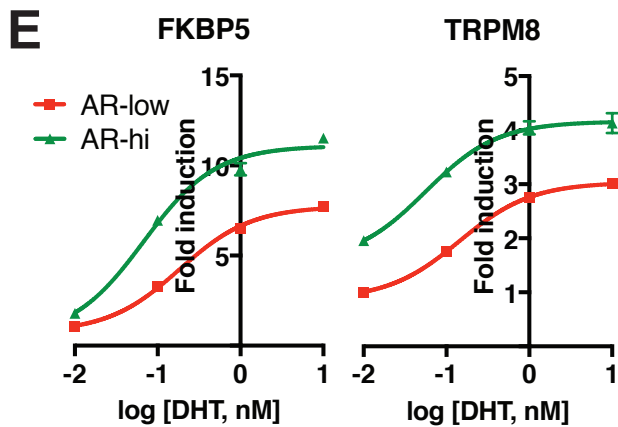



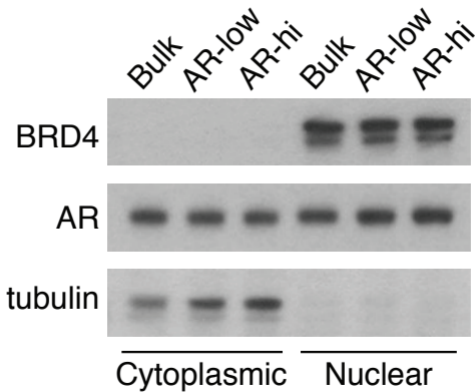

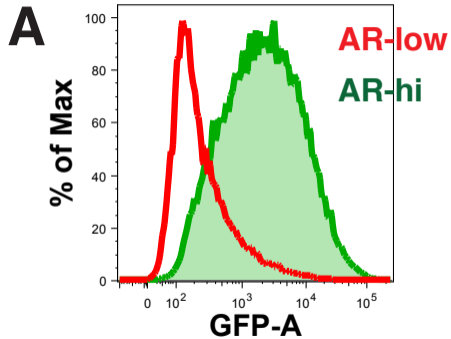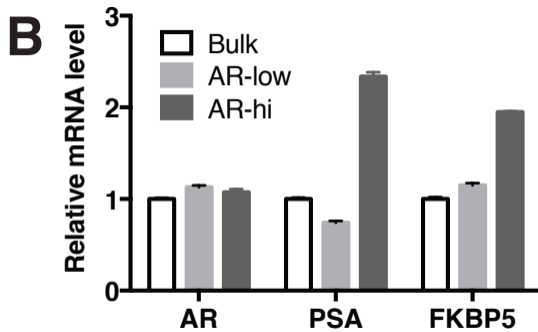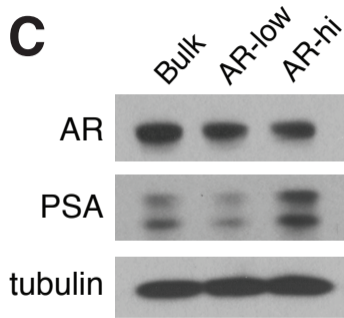

**AR****PSA****Patient 1**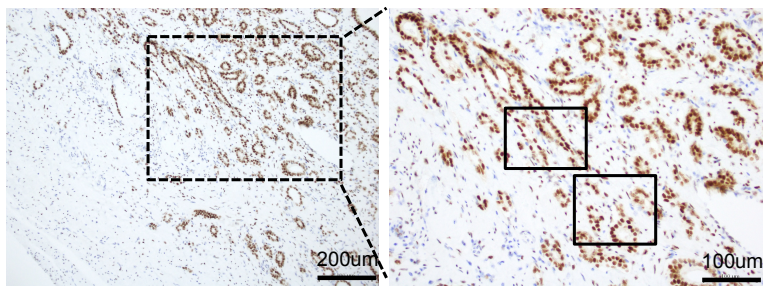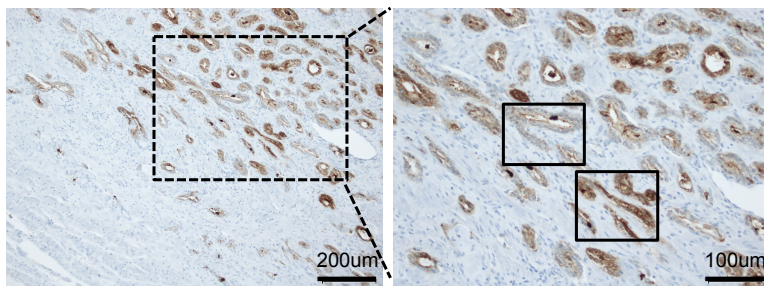**Patient 2**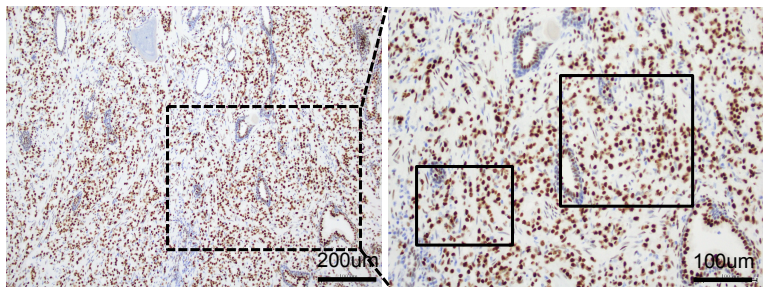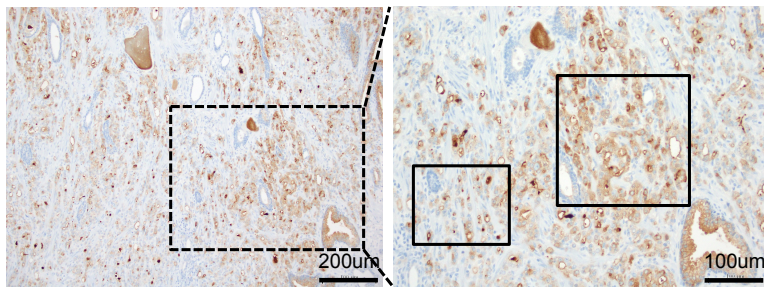**Patient 3**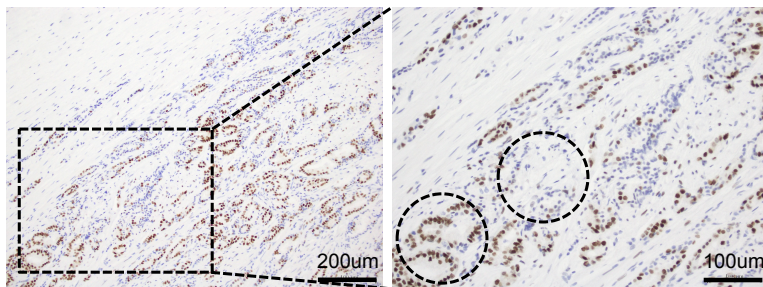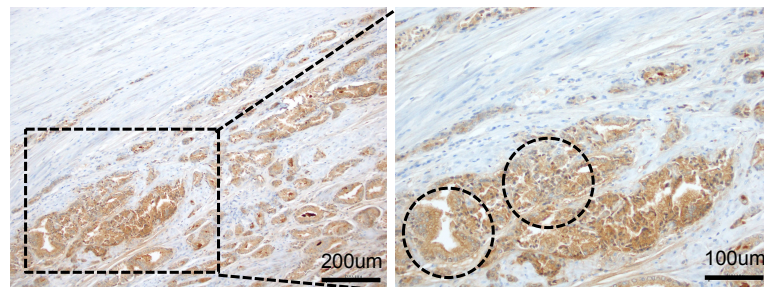

**A**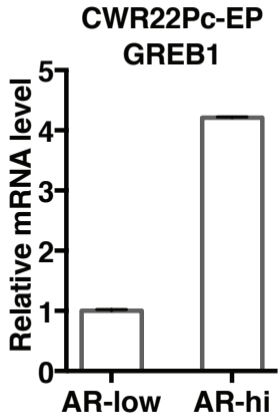**B**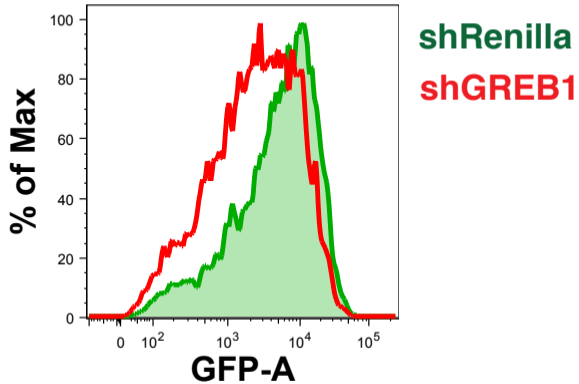

**A**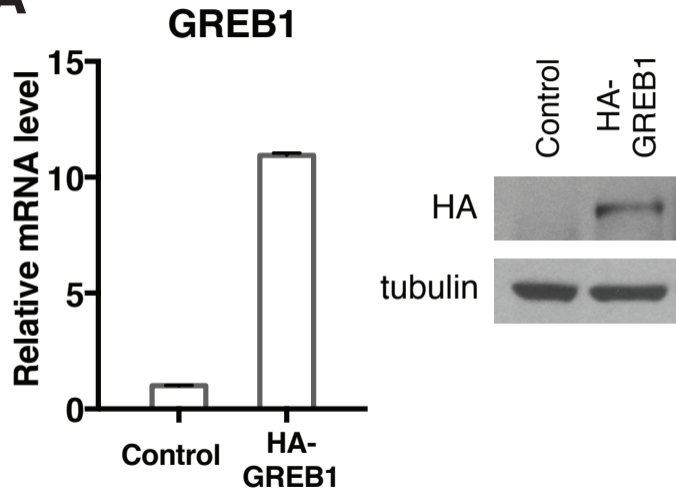**B**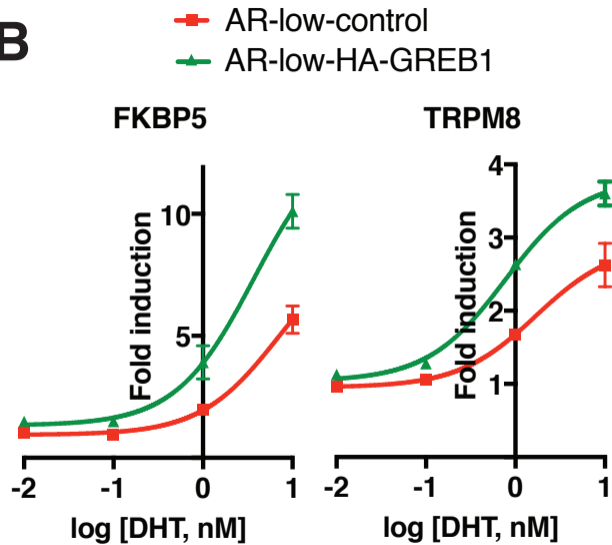

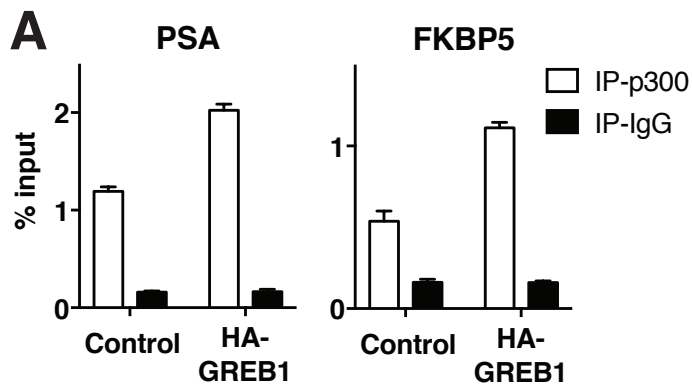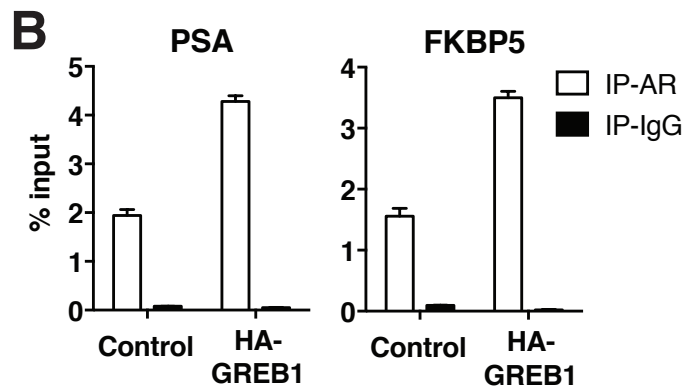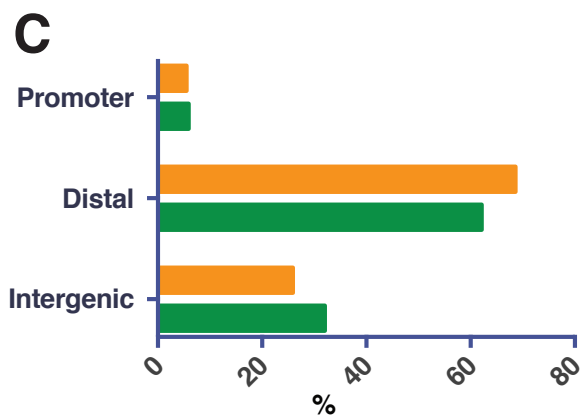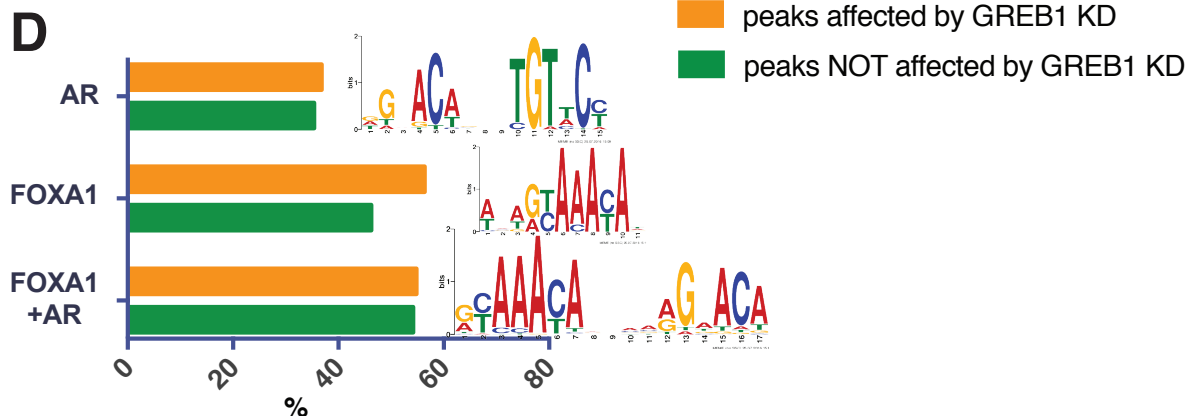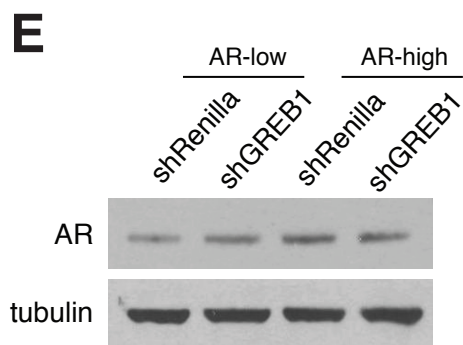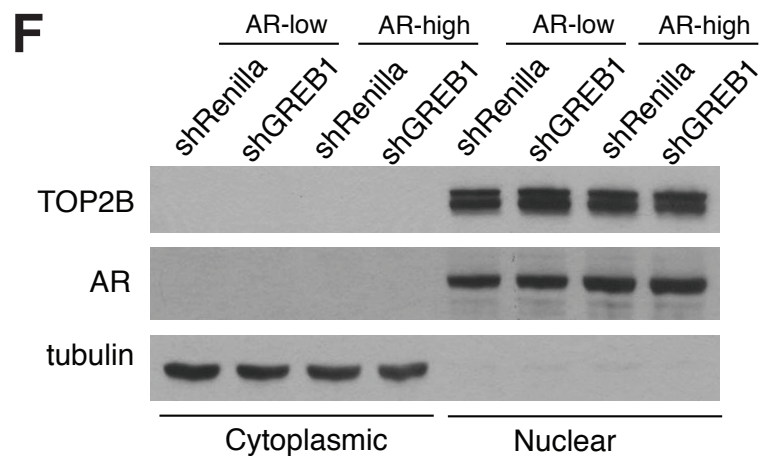

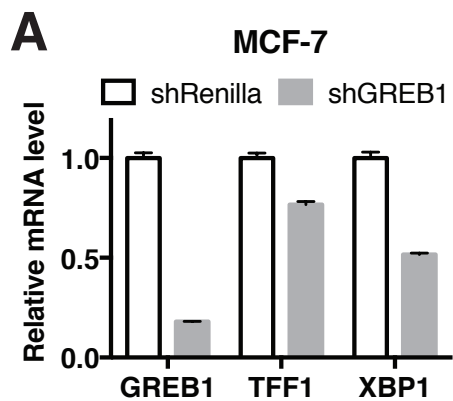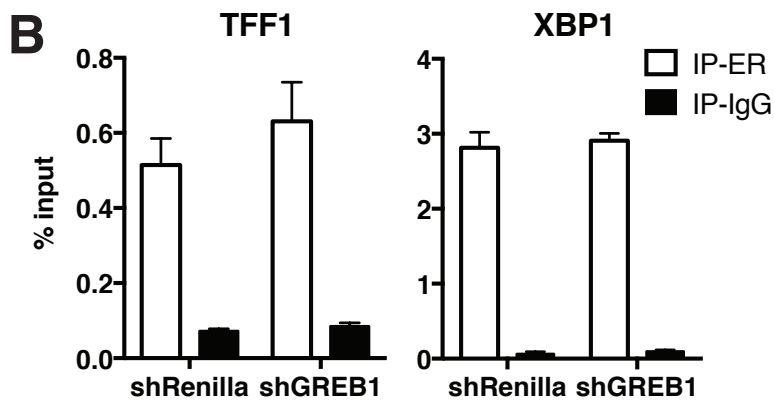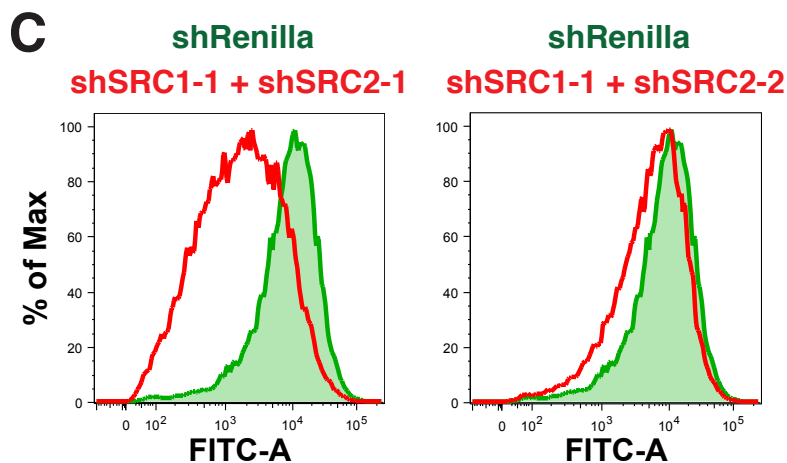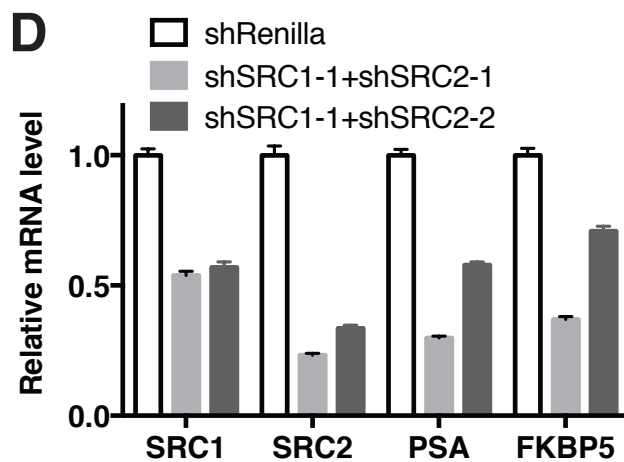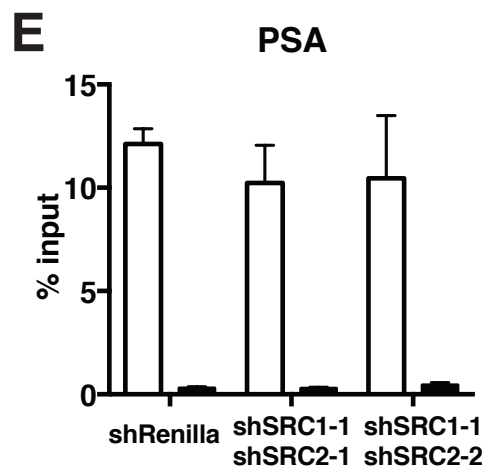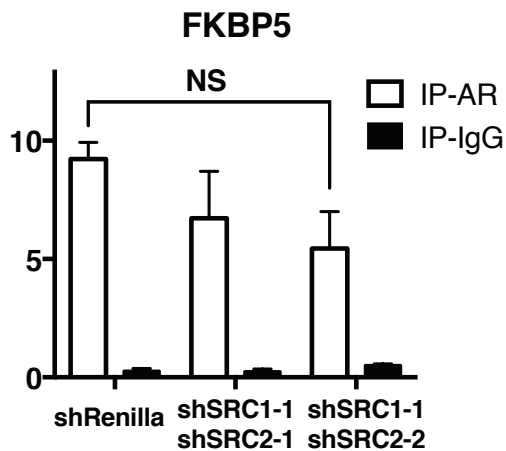

**A**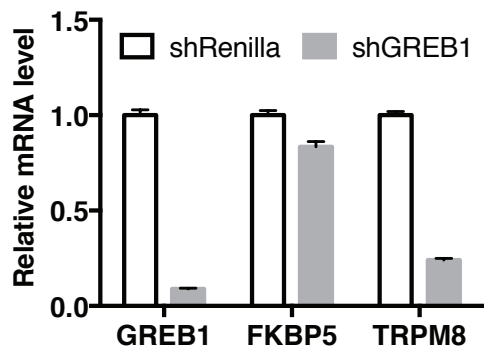**B**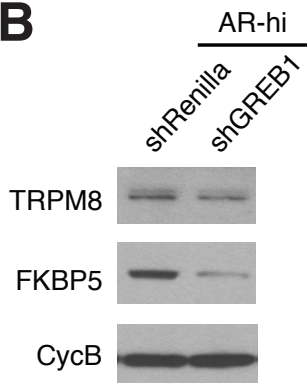**C**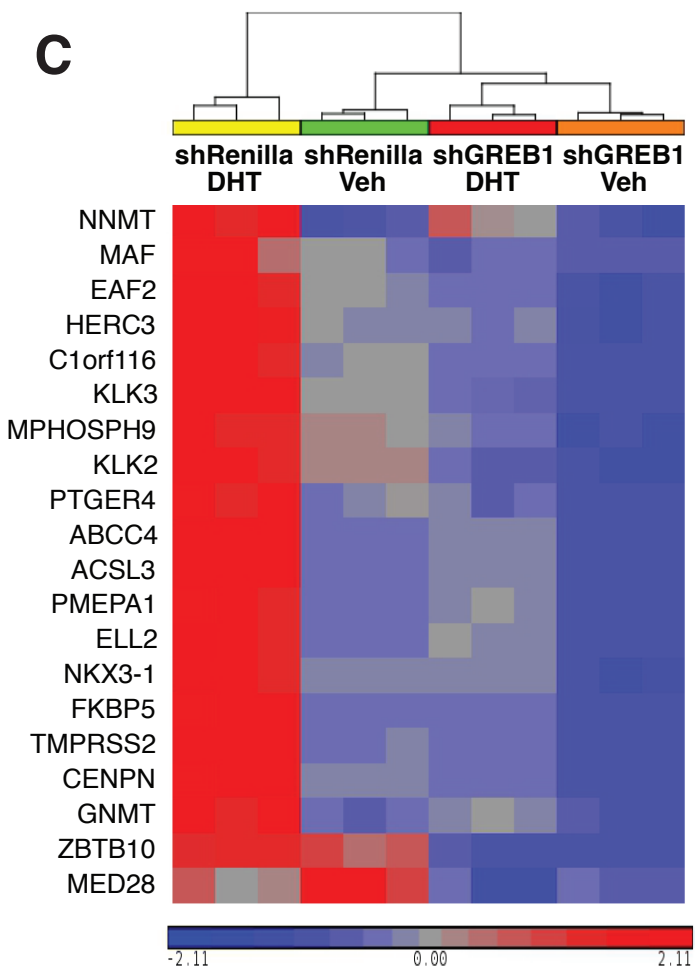**D**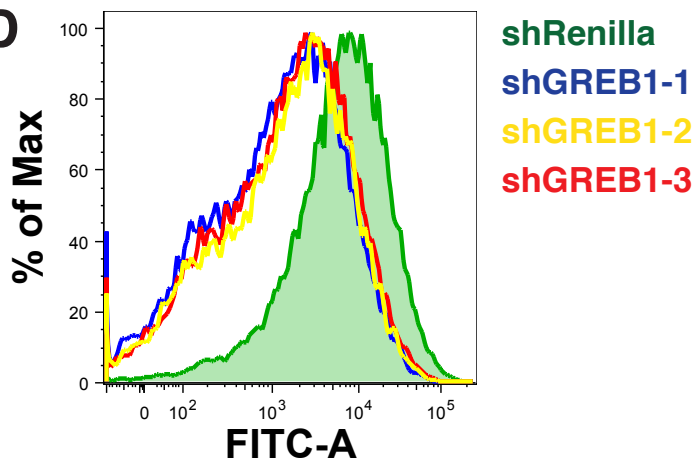**E**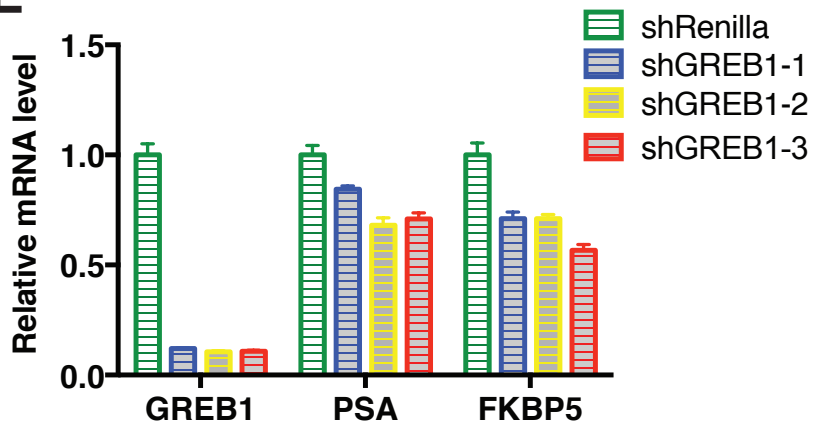

Source: http://biorxiv.org/content/10.1101/433755v1.full.pdf
